# Supplementary material for: Guideline for the prevention of oral and oropharyngeal mucositis in children receiving treatment for cancer or undergoing haematopoietic stem cell transplantation
Source: PubMed Central journal article supplement — BMJ Support Palliat Care. 2015 Mar 27;7(1):7–16. doi: 10.1136/bmjspcare-2014-000804 (PMC5339548; doi:10.1136/bmjspcare-2014-000804), 2015-03-27
Supplement: bmjspcare-2014-000804-s1.pdf [file bmjspcare-2014-000804-s1.pdf]

## APPENDIX 1: GUIDELINE DEVELOPMENT PANEL MEMBERS

| <b>Panel Member</b>                        | <b>Role</b>                               | <b>Institution and Country</b>                                                               |
|--------------------------------------------|-------------------------------------------|----------------------------------------------------------------------------------------------|
| Lillian Sung, MD, PhD                      | Pediatric hematologist/oncologist (chair) | The Hospital for Sick Children ( <i>Canada</i> )                                             |
| Paula Robinson, MD, MSc                    | Guideline methodologist                   | POGO and C17 ( <i>Canada</i> )                                                               |
| L. Lee Dupuis, RPh, ACPR, FCSHP, PhD       | Pediatric oncology pharmacist             | The Hospital for Sick Children ( <i>Canada</i> )                                             |
| John Wiernikowski, BScPhm, PharmD, FISOPP  | Pediatric oncology pharmacist             | McMaster Children's Hospital ( <i>Canada</i> )                                               |
| Paul Gibson, MD                            | Pediatric hematologist/oncologist         | Children's Hospital, London Health Sciences Centre ( <i>Canada</i> )                         |
| Wim Tissing, MD, PhD                       | Pediatric hematologist/oncologist         | Beatrix Kinderziekenhuis / Universitair Medisch Centrum Groningen ( <i>The Netherlands</i> ) |
| Nathaniel Treister, DMD, DMSc              | Pediatric oral medicine specialist        | Brigham and Women's Hospital ( <i>USA</i> )                                                  |
| Christina Baggott, RN, PhD, PPCNP-BC, CPON | Pediatric oncology nurse                  | Stanford University ( <i>USA</i> )                                                           |
| Jennifer Brinklow, RN, BScN                | Pediatric oncology nurse                  | Children's Hospital of Eastern Ontario ( <i>Canada</i> )                                     |
