# Supplementary material for: Guideline for the prevention of oral and oropharyngeal mucositis in children receiving treatment for cancer or undergoing haematopoietic stem cell transplantation
Source: PubMed Central journal article supplement — BMJ Support Palliat Care. 2015 Mar 27;7(1):7–16. doi: 10.1136/bmjspcare-2014-000804 (PMC5339548; doi:10.1136/bmjspcare-2014-000804), 2015-03-27
Supplement: bmjspcare-2014-000804-s3.pdf [file bmjspcare-2014-000804-s3.pdf]

**APPENDIX 3: RESULTS OF THE SEARCH STRATEGIES AND FLOW CHARTS OF STUDY IDENTIFICATION, SELECTION AND REASONS FOR EXCLUSION**

**(a) Randomized Controlled trials of Cryotherapy to Prevent Oral Mucositis in Adults and Children Receiving Treatment for Cancer or Undergoing Hematopoietic Stem Cell Transplantation:** A total of 390 references were identified from the search strategy. After screening titles and abstracts, 28 were retrieved in full and 16 satisfied the eligibility criteria (14 primary and 2 companion papers).

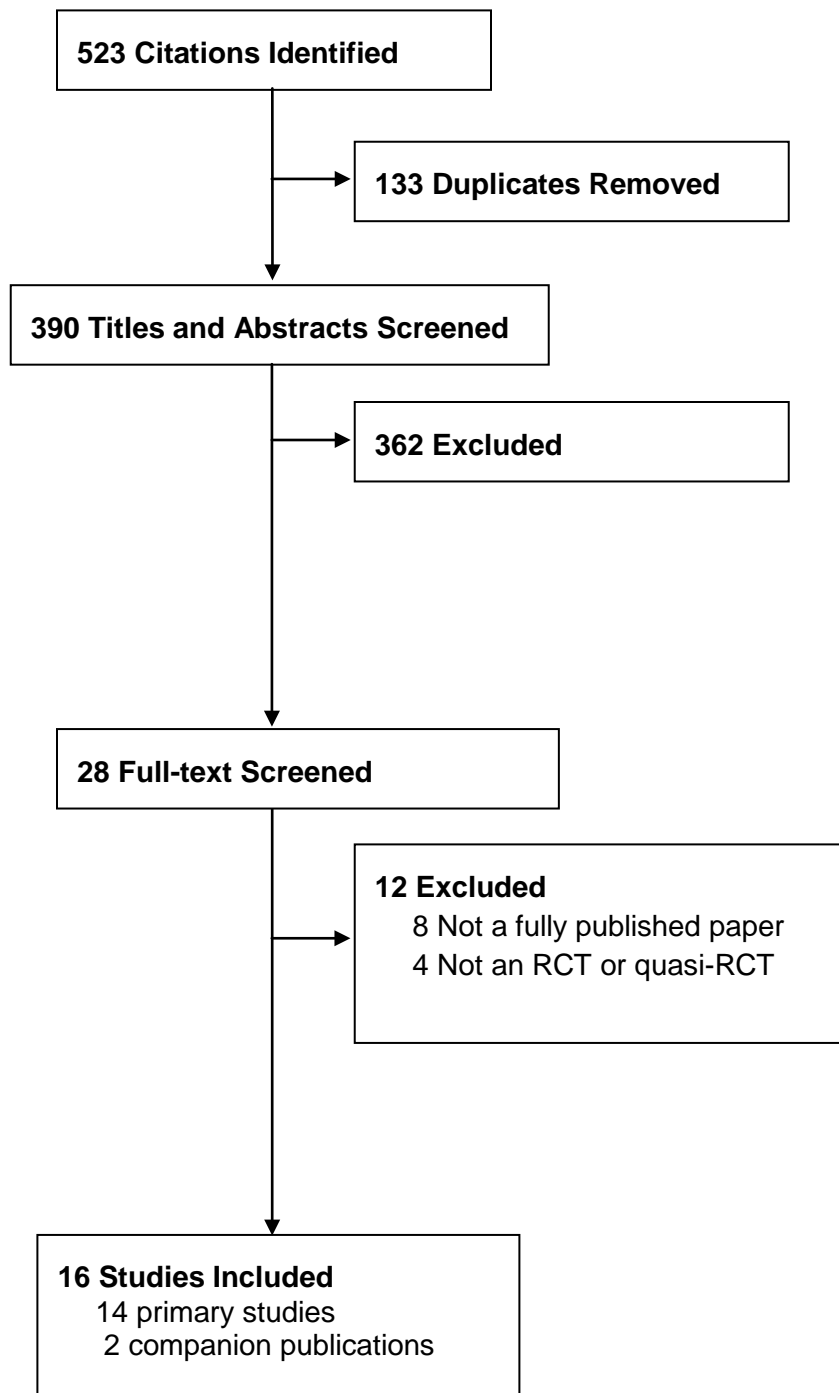

(b) **Randomized Controlled trials of Low Level Light Therapy to Prevent Oral Mucositis in Adults and Children Receiving Treatment for Cancer or Undergoing Hematopoietic Stem Cell Transplantation:** A total of 2,446 references were identified from the search strategy. After screening titles and abstracts, 57 were retrieved in full and 18 satisfied the eligibility criteria (Details available in Oberoi et al.[1]).

(c) **Randomized Controlled trials of Keratinocyte Growth Factor to Prevent Oral Mucositis in Adults and Children Receiving Treatment for Cancer or Undergoing Hematopoietic Stem Cell Transplantation:** A total of 906 references were identified from the search strategy. After screening titles and abstracts, 25 were retrieved in full and 12 satisfied the eligibility criteria (11 primary and 1 companion paper).

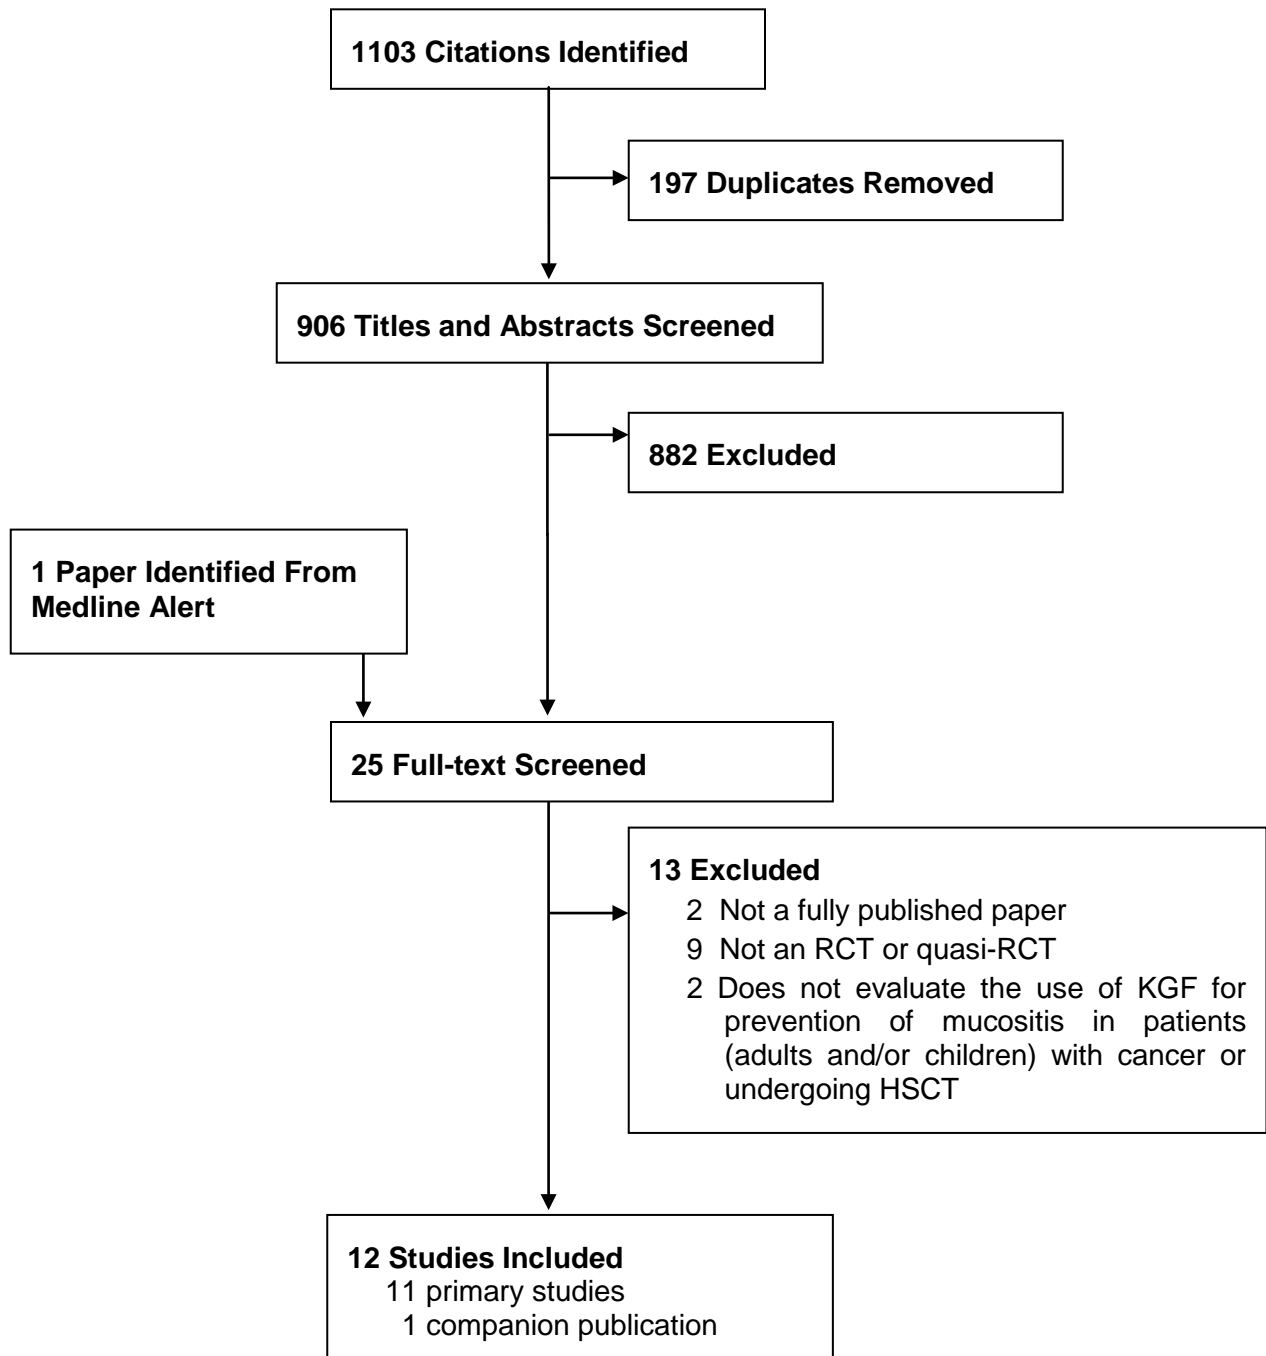

**Non-Randomized Controlled trials of Keratinocyte Growth Factor to Prevent Oral Mucositis in Children Receiving Treatment for Cancer or Undergoing Hematopoietic Stem Cell Transplantation:** As the search for RCTs of keratinocyte growth factor did not use trial design as a filter, the same 906 references were evaluated. After screening titles and abstracts, 5 were retrieved in full and 4 satisfied the eligibility criteria.

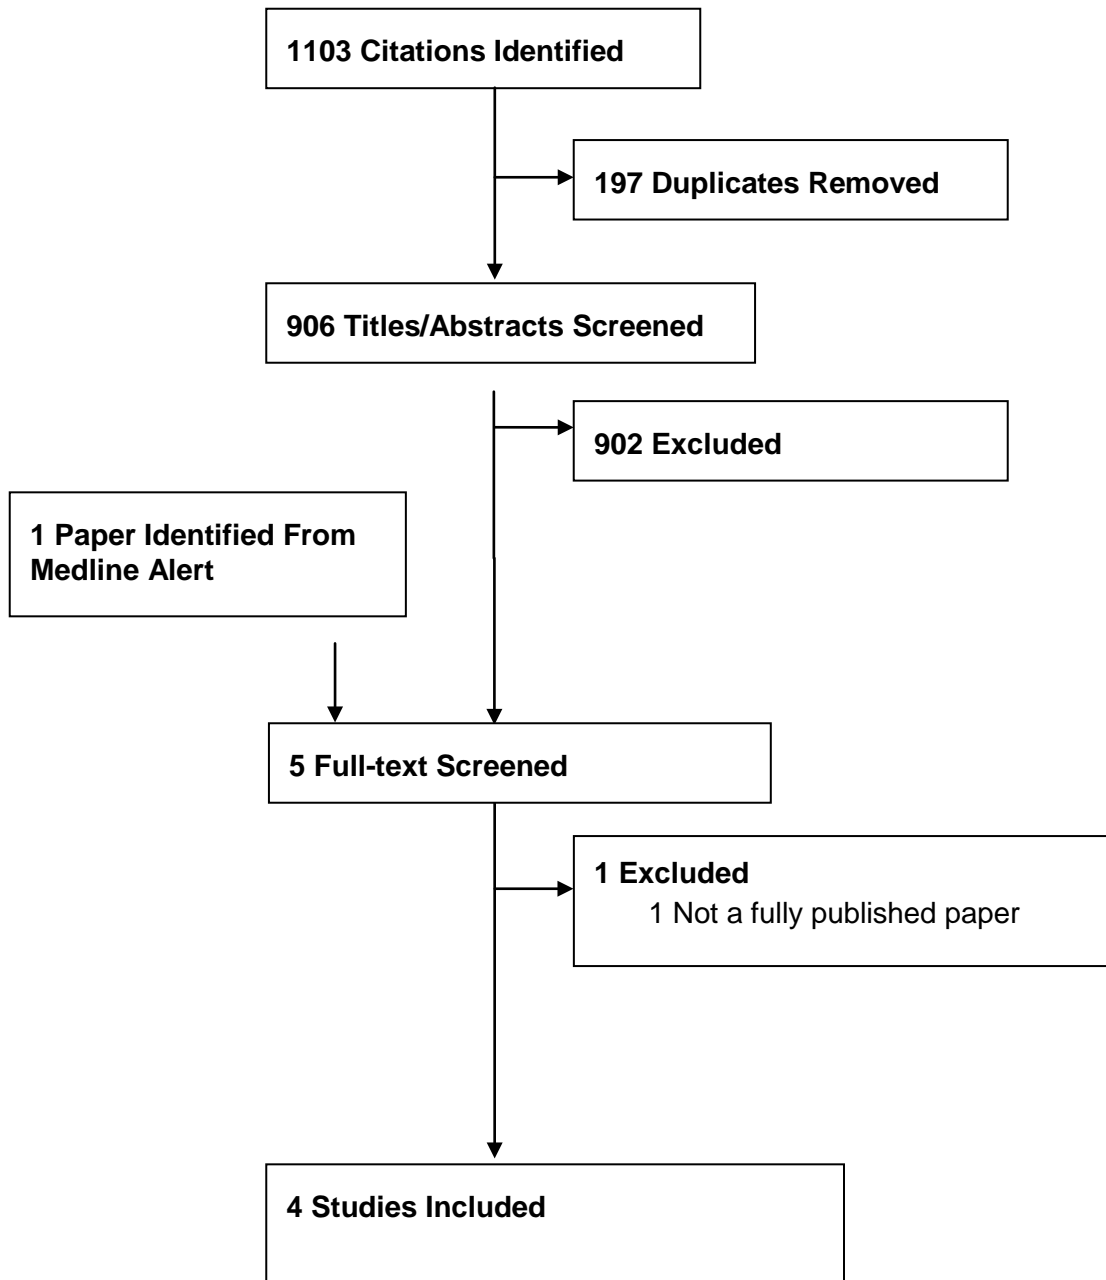

(d) **Randomized Controlled trials of Any Intervention to Prevent Oral Mucositis in Children Receiving Treatment for Cancer or Undergoing Hematopoietic Stem Cell Transplantation:** A total of 3,873 references were identified from the search strategy. After screening titles and abstracts, 105 were retrieved in full and 24 satisfied the eligibility criteria (21 primary and 3 companion papers).

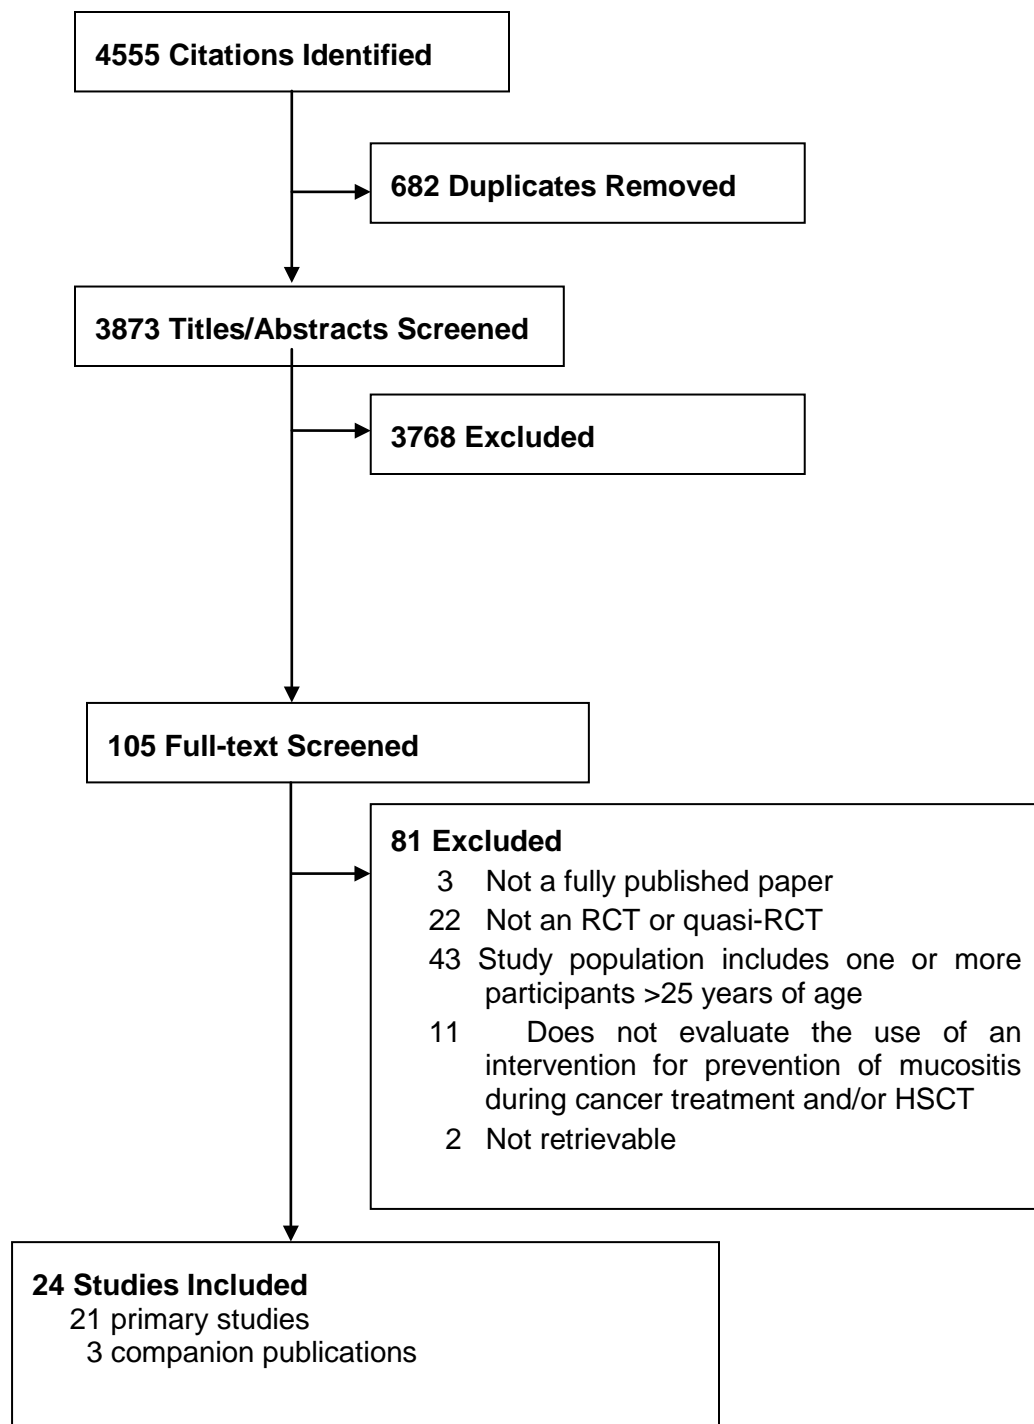

Abbreviations: RCT – randomized controlled trial; HSCT – hematopoietic stem cell transplantation

## REFERENCES

1. Oberoi S, Zamperlini–Netto G, Beyene J, Treister N, Sung L. Effect of prophylactic low level laser therapy on oral mucositis: a systematic review and meta-analysis *Journal of clinical oncology : official journal of the American Society of Clinical Oncology* 2014;**PlosOne (in press)**
