# Supplementary material for: Guideline for the prevention of oral and oropharyngeal mucositis in children receiving treatment for cancer or undergoing haematopoietic stem cell transplantation
Source: PubMed Central journal article supplement — BMJ Support Palliat Care. 2015 Mar 27;7(1):7–16. doi: 10.1136/bmjspcare-2014-000804 (PMC5339548; doi:10.1136/bmjspcare-2014-000804), 2015-03-27
Supplement: bmjspcare-2014-000804-s4.pdf [file bmjspcare-2014-000804-s4.pdf]

**APPENDIX 4: RANDOMIZED CONTROLLED TRIALS OF CRYOTHERAPY FOR THE PREVENTION OF ORAL MUCOSITIS IN ADULT AND PEDIATRIC PATIENTS RECEIVING TREATMENT FOR CANCER OR UNDERGOING HEMATOPOIETIC STEM CELL TRANSPLANTATION – STUDY CHARACTERISTICS**

| STUDY CHARACTERISTICS AND PARTICIPANTS           |                 |      |                               |                             |                    |                              |                           |                                      |                 |                                                |                                           |                           |
|--------------------------------------------------|-----------------|------|-------------------------------|-----------------------------|--------------------|------------------------------|---------------------------|--------------------------------------|-----------------|------------------------------------------------|-------------------------------------------|---------------------------|
| First Author (Year)                              | Enrollment Year |      | Country of Patient Enrollment | Pharma Sponsorship Declared | Total N Randomized | Age (Pediatric, Adult, Both) | Specific Cancer Diagnoses | Population Type (Cancer, HSCT, Both) | Transplant Type | Treatment Related to Cryotherapy               | Duration of Cryotherapy                   | Radiotherapy in Oral Area |
|                                                  | Start           | End  |                               |                             |                    |                              |                           |                                      |                 |                                                |                                           |                           |
| Katranci (2012) [1]                              | NR              | NR   | Turkey                        | No                          | 60                 | Adult                        | Various                   | Cancer                               | NA              | 5-FU, leukovorin                               | 30 minutes                                | No                        |
| Salvador (2012) [2]                              | 2007            | 2007 | Canada                        | No                          | 46                 | Adult                        | Multiple myeloma          | HSCT                                 | Auto            | Melphalan                                      | 60 minutes                                | No                        |
| Sorensen (2008)[3]                               | 2001            | 2005 | Denmark                       | No                          | 225                | Adult                        | Gastro-intestinal cancer  | Cancer                               | NA              | 5-FU, leukovorin                               | 45 minutes                                | No                        |
| Svanberg (2007) [4] (companion papers: [5], [6]) | 2002            | 2004 | Sweden                        | No                          | 78                 | Adult                        | Various                   | HSCT                                 | Auto, allo      | Various                                        | Throughout chemotherapy session           | Sometimes                 |
| Gori (2007) [7]                                  | 2004            | 2006 | Italy                         | No                          | 130                | Both                         | Hem diagnosis             | HSCT                                 | Allo            | Methotrexate                                   | At least 1 hour                           | Sometimes                 |
| Papadeas (2007) [8]                              | NR              | NR   | Greece                        | No                          | 85                 | Adult                        | Unclear                   | Cancer                               | NA              | 5-FU, leukovorin                               | 50 minutes                                | No                        |
| Lilleby (2006) [9]                               | 2003            | 2005 | US                            | No                          | 41                 | Adult                        | Multiple myeloma          | HSCT                                 | Auto            | Melphalan                                      | 7 hours                                   | No                        |
| Baydar (2005) [10]                               | NR              | NR   | Turkey                        | No                          | 99                 | Adult                        | Various                   | Cancer                               | NA              | 5-FU, leukovorin                               | From start of 5-FU until 10 minutes after | No                        |
| Karagozoglu (2005) [11]                          | 2000            | 2001 | Turkey                        | No                          | 60                 | Adult                        | Various                   | Cancer                               | NA              | Etoposide, cisplatin, mitomycin-C, vinblastine | Throughout chemotherapy infusion          | No                        |
| Nikoletti (2005) [12]                            | NR              | NR   | Australia                     | No                          | 79                 | Adult                        | Various                   | Cancer                               | NA              | 5-FU, leukovorin                               | 30 minutes                                | No                        |
| Cascinu (1994) [13]                              | NR              | NR   | Italy                         | NR                          | 84                 | Adult                        | Various                   | Cancer                               | NA              | 5-FU, leukovorin                               | 30 minutes                                | No                        |
| Rocke (1993) [14]                                | NR              | NR   | US                            | No                          | 179                | Adult                        | Unclear                   | Cancer                               | NA              | 5-FU, leukovorin                               | 60 minutes                                | No                        |
| Mahood (1991) [15]                               | NR              | NR   | US                            | No                          | 95                 | NR                           | Unclear                   | Cancer                               | NA              | 5-FU, leukovorin                               | 30 minutes                                | No                        |
| Kakoei (2013) [16]                               | NR              | NR   | Iran                          | No                          | 40                 | Adult                        | Head and neck cancer      | Cancer                               | NA              | Radiotherapy                                   | 10 minutes                                | Yes                       |

Abbreviations: NR - not reported; NA - not applicable; pharma – pharmaceutical company; N – number; hem – hematological; HSCT - hematopoietic stem cell transplantation; auto – autologous; allo – allogeneic; 5-FU – 5-fluorouracil; US – United States

## REFERENCES

1. Katranci N, Ovayolu N, Ovayolu O, Sevinc A. Evaluation of the effect of cryotherapy in preventing oral mucositis associated with chemotherapy - a randomized controlled trial. *Eur J Oncol Nurs* 2012;16(4):339-44 doi: <http://dx.doi.org/10.1016/j.ejon.2011.07.008published> Online First: Epub Date]].
2. Salvador P, Azusano C, Wang L, Howell D. A pilot randomized controlled trial of an oral care intervention to reduce mucositis severity in stem cell transplant patients. *J Pain Symptom Manage* 2012;44(1):64-73 doi: <http://dx.doi.org/10.1016/j.jpainsymman.2011.08.012published> Online First: Epub Date]].
3. Sorensen JB, Skovsgaard T, Bork E, Damstrup L, Ingeberg S. Double-blind, placebo-controlled, randomized study of chlorhexidine prophylaxis for 5-fluorouracil-based chemotherapy-induced oral mucositis with nonblinded randomized comparison to oral cooling (cryotherapy) in gastrointestinal malignancies. *Cancer* 2008;112(7):1600-6 doi: <http://dx.doi.org/10.1002/cncr.23328published> Online First: Epub Date]].
4. Svanberg A, Birgegard G, Ohrn K. Oral cryotherapy reduces mucositis and opioid use after myeloablative therapy--a randomized controlled trial. *Supportive care in cancer : official journal of the Multinational Association of Supportive Care in Cancer* 2007;15(10):1155-61
5. Svanberg A, Ohrn K, Birgegard G. Five-year follow-up of survival and relapse in patients who received cryotherapy during high-dose chemotherapy for stem cell transplantation shows no safety concerns. *Eur J Cancer Care (Engl)* 2012;21(6):822-8 doi: <http://dx.doi.org/10.1111/ecc.12009published> Online First: Epub Date]].
6. Svanberg A, Ohrn K, Birgegard G. Oral cryotherapy reduces mucositis and improves nutrition - a randomised controlled trial. *J Clin Nurs* 2010;19(15-16):2146-51 doi: <http://dx.doi.org/10.1111/j.1365-2702.2010.03255.xpublished> Online First: Epub Date]].

7. Gori E, Arpinati M, Bonifazi F, et al. Cryotherapy in the prevention of oral mucositis in patients receiving low-dose methotrexate following myeloablative allogeneic stem cell transplantation: a prospective randomized study of the Gruppo Italiano Trapianto di Midollo Osseo nurses group. *Bone marrow transplantation* 2007;39(6):347-52 doi: 10.1038/sj.bmt.1705590published Online First: Epub Date]].
8. Papadeas E, Naxakis S, Riga M, Kalofonos C. Prevention of 5-fluorouracil-related stomatitis by oral cryotherapy: a randomized controlled study. *Eur J Oncol Nurs* 2007;11(1):60-5
9. Lilleby K, Garcia P, Gooley T, et al. A prospective, randomized study of cryotherapy during administration of high-dose melphalan to decrease the severity and duration of oral mucositis in patients with multiple myeloma undergoing autologous peripheral blood stem cell transplantation. *Bone marrow transplantation* 2006;37(11):1031-5
10. Baydar M, Dikilitas M, Sevinc A, Aydogdu I. Prevention of oral mucositis due to 5-fluorouracil treatment with oral cryotherapy. *J Natl Med Assoc* 2005;97(8):1161-4
11. Karagozoglu S, Filiz Ulusoy M. Chemotherapy: the effect of oral cryotherapy on the development of mucositis. *J Clin Nurs* 2005;14(6):754-65
12. Nikoletti S, Hyde S, Shaw T, Myers H, Kristjanson LJ. Comparison of plain ice and flavoured ice for preventing oral mucositis associated with the use of 5 fluorouracil. *J Clin Nurs* 2005;14(6):750-3
13. Cascinu S, Fedeli A, Fedeli SL, Catalano G. Oral cooling (cryotherapy), an effective treatment for the prevention of 5-fluorouracil-induced stomatitis. *Eur J Cancer B Oral Oncol* 1994;30B(4):234-6
14. Rocke LK, Loprinzi CL, Lee JK, et al. A randomized clinical trial of two different durations of oral cryotherapy for prevention of 5-fluorouracil-related stomatitis. *Cancer* 1993;72(7):2234-8

15. Mahood DJ, Dose AM, Loprinzi CL, et al. Inhibition of fluorouracil-induced stomatitis by oral cryotherapy. *Journal of clinical oncology : official journal of the American Society of Clinical Oncology* 1991;9(3):449-52
16. Kakoei S, Ghassemi A, Nakhaei NR. Effect of cryotherapy on oral mucositis in patients with head and neck cancers receiving radiotherapy. *Int J Radiat* 2013;11(2):117-20
