# Supplementary material for: Guideline for the prevention of oral and oropharyngeal mucositis in children receiving treatment for cancer or undergoing haematopoietic stem cell transplantation
Source: PubMed Central journal article supplement — BMJ Support Palliat Care. 2015 Mar 27;7(1):7–16. doi: 10.1136/bmjspcare-2014-000804 (PMC5339548; doi:10.1136/bmjspcare-2014-000804), 2015-03-27
Supplement: bmjspcare-2014-000804-s5.pdf [file bmjspcare-2014-000804-s5.pdf]

**APPENDIX 5: RANDOMIZED CONTROLLED TRIALS OF CRYOTHERAPY FOR THE PREVENTION OF ORAL MUCOSITIS IN ADULT AND PEDIATRIC PATIENTS RECEIVING TREATMENT FOR CANCER OR UNDERGOING HEMATOPOIETIC STEM CELL TRANSPLANTATION - METHODOLOGY**

| METHODOLOGY                                      |                  |                                                    |                                                                            |                                                                                                                                        | RISK OF BIAS FOR RANDOMIZED CONTROL TRIALS |                                  |                                     |                            |                                                                                           |                                    |
|--------------------------------------------------|------------------|----------------------------------------------------|----------------------------------------------------------------------------|----------------------------------------------------------------------------------------------------------------------------------------|--------------------------------------------|----------------------------------|-------------------------------------|----------------------------|-------------------------------------------------------------------------------------------|------------------------------------|
| First Author (Year)                              | RCT or quasi-RCT | Study design: (Parallel group, Cross-over, N-of-1) | Scales Used to Measure Mucositis                                           | Frequency and Timing of Mucositis Assessment                                                                                           | Adequate sequence generation?              | Adequate allocation concealment? | Participants and personnel blinded? | Outcome assessors blinded? | Loss to follow-up is less than 20% and/or equally distributed between both interventions? | Study free of selective reporting? |
| Katransci (2012) [1]                             | RCT              | Parallel group                                     | WHO                                                                        | Days 7, 14 and 21 after chemotherapy                                                                                                   | Yes                                        | Unclear                          | No                                  | No                         | Yes                                                                                       | Yes                                |
| Salvador (2012) [2]                              | RCT              | Parallel group                                     | WHO                                                                        | Days 3, 6, 9, and 12 after stem cell infusion                                                                                          | Yes                                        | Unclear                          | No                                  | Yes                        | Yes                                                                                       | Yes                                |
| Sorensen (2008) [3]                              | RCT              | Parallel group                                     | CTCAE v2.0                                                                 | Day 14 and 28                                                                                                                          | Unclear                                    | Unclear                          | No                                  | No                         | Yes                                                                                       | Yes                                |
| Svanberg (2007) [4] (companion papers: [5], [6]) | RCT              | Parallel group                                     | OMAS, WHO                                                                  | Start of chemotherapy daily until day 21                                                                                               | Unclear                                    | Unclear                          | No                                  | No                         | Yes                                                                                       | Yes                                |
| Gori (2007) [7]                                  | RCT              | Parallel group                                     | WHO                                                                        | Day stem cell infusion until day 20                                                                                                    | Unclear                                    | Unclear                          | No                                  | No                         | Yes                                                                                       | Yes                                |
| Papadeas (2007) [8]                              | Quasi-RCT        | Parallel group                                     | 4 point grading scale                                                      | Once, one month after treatment                                                                                                        | No                                         | No                               | No                                  | Yes                        | No                                                                                        | Yes                                |
| Lilleby (2006) [9]                               | RCT              | Parallel group                                     | CTCAE v2.0                                                                 | Daily from day 2 to day 28 post stem cell infusion                                                                                     | Unclear                                    | Unclear                          | No                                  | No                         | Yes                                                                                       | Yes                                |
| Baydar (2005) [10]                               | Quasi-RCT        | Extended cross-over                                | WHO                                                                        | Days 5, 10, 15 and 21 from chemotherapy start                                                                                          | No                                         | Unclear                          | No                                  | No                         | Yes                                                                                       | Yes                                |
| Karagozoglou (2005) [11]                         | Quasi-RCT        | Parallel group                                     | Patient-judged mucositis grading and physician-judged mucositis grading    | Patient report: Daily from day 1 of chemotherapy until day 21; Physician report - days 1 and 21, and days 2 and 3 if patient in clinic | No                                         | Unclear                          | No                                  | No                         | Yes                                                                                       | Yes                                |
| Nikoletti (2005) [12]                            | RCT              | Cross-over                                         | Oral Assessment Guide and Western Consortium Cancer Nursing Research Scale | Baseline and day 15 of each chemotherapy course                                                                                        | Unclear                                    | Unclear                          | No                                  | No                         | No                                                                                        | Yes                                |

| METHODOLOGY         |                  |                                                    |                                                                                                          |                                                                                                               | RISK OF BIAS FOR RANDOMIZED CONTROL TRIALS |                                  |                                     |                            |                                                                                           |                                    |
|---------------------|------------------|----------------------------------------------------|----------------------------------------------------------------------------------------------------------|---------------------------------------------------------------------------------------------------------------|--------------------------------------------|----------------------------------|-------------------------------------|----------------------------|-------------------------------------------------------------------------------------------|------------------------------------|
| First Author (Year) | RCT or quasi-RCT | Study design: (Parallel group, Cross-over, N-of-1) | Scales Used to Measure Mucositis                                                                         | Frequency and Timing of Mucositis Assessment                                                                  | Adequate sequence generation?              | Adequate allocation concealment? | Participants and personnel blinded? | Outcome assessors blinded? | Loss to follow-up is less than 20% and/or equally distributed between both interventions? | Study free of selective reporting? |
| Cascinu (1994) [13] | RCT              | Parallel group                                     | Global assessment of the physicians' judgment and patients' description of mucositis severity graded 0-4 | Once weekly until start of next course                                                                        | Unclear                                    | Unclear                          | No                                  | No                         | Yes                                                                                       | Yes                                |
| Rocke (1993) [14]   | RCT              | Parallel group                                     | Physician and patient judged mucositis graded 0 to 4                                                     | Physician: Approximately 1 month after treatment initiation; Patient: 2 to 3 weeks after treatment initiation | Unclear                                    | Unclear                          | No                                  | No                         | Yes                                                                                       | Yes                                |
| Mahood (1991) [15]  | RCT              | Parallel group                                     | Physician and patient judged mucositis graded 0 to 4                                                     | Physician: Approximately 1 month after treatment initiation; Patient: 2 to 3 weeks after treatment initiation | Unclear                                    | Unclear                          | No                                  | No                         | Yes                                                                                       | Yes                                |
| Kakoei (2013) [16]  | RCT              | Parallel group                                     | Physician and patient judged mucositis graded 0 to 4                                                     | Days 1, 7 and 14                                                                                              | Unclear                                    | Unclear                          | No                                  | No                         | Yes                                                                                       | No                                 |

Abbreviations: RCT – randomized controlled trial; WHO – World Health Organization; OMAS – Oral Mucositis Assessment Scale; CTCAE – Common Terminology Criteria for Adverse Events

## REFERENCES

1. Katranci N, Ovayolu N, Ovayolu O, Sevinc A. Evaluation of the effect of cryotherapy in preventing oral mucositis associated with chemotherapy - a randomized controlled trial. *Eur J Oncol Nurs* 2012;**16**(4):339-44 doi: <http://dx.doi.org/10.1016/j.ejon.2011.07.008published> Online First: Epub Date]].
2. Salvador P, Azusano C, Wang L, Howell D. A pilot randomized controlled trial of an oral care intervention to reduce mucositis severity in stem cell transplant patients. *J Pain Symptom Manage* 2012;**44**(1):64-73 doi: <http://dx.doi.org/10.1016/j.jpainsymman.2011.08.012published> Online First: Epub Date]].
3. Sorensen JB, Skovsgaard T, Bork E, Damstrup L, Ingeberg S. Double-blind, placebo-controlled, randomized study of chlorhexidine prophylaxis for 5-fluorouracil-based chemotherapy-induced oral mucositis with nonblinded randomized comparison to oral cooling (cryotherapy) in gastrointestinal malignancies. *Cancer* 2008;**112**(7):1600-6 doi: <http://dx.doi.org/10.1002/cncr.23328published> Online First: Epub Date]].
4. Svanberg A, Birgegard G, Ohrn K. Oral cryotherapy reduces mucositis and opioid use after myeloablative therapy--a randomized controlled trial. *Supportive care in cancer : official journal of the Multinational Association of Supportive Care in Cancer* 2007;**15**(10):1155-61
5. Svanberg A, Ohrn K, Birgegard G. Five-year follow-up of survival and relapse in patients who received cryotherapy during high-dose chemotherapy for stem cell transplantation shows no safety concerns. *Eur J Cancer Care (Engl)* 2012;**21**(6):822-8 doi: <http://dx.doi.org/10.1111/ecc.12009published> Online First: Epub Date]].
6. Svanberg A, Ohrn K, Birgegard G. Oral cryotherapy reduces mucositis and improves nutrition - a randomised controlled trial. *J Clin Nurs* 2010;**19**(15-16):2146-51 doi: <http://dx.doi.org/10.1111/j.1365-2702.2010.03255.xpublished> Online First: Epub Date]].

7. Gori E, Arpinati M, Bonifazi F, et al. Cryotherapy in the prevention of oral mucositis in patients receiving low-dose methotrexate following myeloablative allogeneic stem cell transplantation: a prospective randomized study of the Gruppo Italiano Trapianto di Midollo Osseo nurses group. *Bone marrow transplantation* 2007;**39**(6):347-52 doi: 10.1038/sj.bmt.1705590published Online First: Epub Date]].
8. Papadeas E, Naxakis S, Riga M, Kalofonos C. Prevention of 5-fluorouracil-related stomatitis by oral cryotherapy: a randomized controlled study. *Eur J Oncol Nurs* 2007;**11**(1):60-5
9. Lilleby K, Garcia P, Gooley T, et al. A prospective, randomized study of cryotherapy during administration of high-dose melphalan to decrease the severity and duration of oral mucositis in patients with multiple myeloma undergoing autologous peripheral blood stem cell transplantation. *Bone marrow transplantation* 2006;**37**(11):1031-5
10. Baydar M, Dikilitas M, Sevinc A, Aydogdu I. Prevention of oral mucositis due to 5-fluorouracil treatment with oral cryotherapy. *J Natl Med Assoc* 2005;**97**(8):1161-4
11. Karagozoglu S, Filiz Ulusoy M. Chemotherapy: the effect of oral cryotherapy on the development of mucositis. *J Clin Nurs* 2005;**14**(6):754-65
12. Nikoletti S, Hyde S, Shaw T, Myers H, Kristjanson LJ. Comparison of plain ice and flavoured ice for preventing oral mucositis associated with the use of 5 fluorouracil. *J Clin Nurs* 2005;**14**(6):750-3
13. Cascinu S, Fedeli A, Fedeli SL, Catalano G. Oral cooling (cryotherapy), an effective treatment for the prevention of 5-fluorouracil-induced stomatitis. *Eur J Cancer B Oral Oncol* 1994;**30B**(4):234-6
14. Rocke LK, Loprinzi CL, Lee JK, et al. A randomized clinical trial of two different durations of oral cryotherapy for prevention of 5-fluorouracil-related stomatitis. *Cancer* 1993;**72**(7):2234-8

15. Mahood DJ, Dose AM, Loprinzi CL, et al. Inhibition of fluorouracil-induced stomatitis by oral cryotherapy. *Journal of clinical oncology : official journal of the American Society of Clinical Oncology* 1991;**9**(3):449-52
16. Kakoei S, Ghassemi A, Nakhaei NR. Effect of cryotherapy on oral mucositis in patients with head and neck cancers receiving radiotherapy. *Int J Radiat* 2013;**11**(2):117-20
