# Supplementary material for: Guideline for the prevention of oral and oropharyngeal mucositis in children receiving treatment for cancer or undergoing haematopoietic stem cell transplantation
Source: PubMed Central journal article supplement — BMJ Support Palliat Care. 2015 Mar 27;7(1):7–16. doi: 10.1136/bmjspcare-2014-000804 (PMC5339548; doi:10.1136/bmjspcare-2014-000804), 2015-03-27
Supplement: bmjspcare-2014-000804-s6.pdf [file bmjspcare-2014-000804-s6.pdf]

**APPENDIX 6: RANDOMIZED CONTROLLED TRIALS OF CRYOTHERAPY FOR THE PREVENTION OF ORAL MUCOSITIS IN ADULT AND PEDIATRIC PATIENTS RECEIVING TREATMENT FOR CANCER OR UNDERGOING HEMATOPOIETIC STEM CELL TRANSPLANTATION – OUTCOMES**

| First Author (Year)                              | COMPARISONS                           | OUTCOMES                             |                                      |                                                                                                                                                                                                                                                                                                                                  |                                                                                                                                                                                   |                                                                                                                                                          |
|--------------------------------------------------|---------------------------------------|--------------------------------------|--------------------------------------|----------------------------------------------------------------------------------------------------------------------------------------------------------------------------------------------------------------------------------------------------------------------------------------------------------------------------------|-----------------------------------------------------------------------------------------------------------------------------------------------------------------------------------|----------------------------------------------------------------------------------------------------------------------------------------------------------|
|                                                  |                                       | Number Received Intervention Group 1 | Number Received Intervention Group 2 | Description of Main Mucositis Findings                                                                                                                                                                                                                                                                                           | Description of Main Pain Findings                                                                                                                                                 | Description of Adverse Events                                                                                                                            |
| Katraci (2012) [1]                               | Cryotherapy versus no cryotherapy     | 30                                   | 30                                   | For day 21, 1/30 in cryotherapy arm vs 6/30 in control group had severe mucositis                                                                                                                                                                                                                                                | Not measured                                                                                                                                                                      | No toxicity and no discomfort                                                                                                                            |
| Salvador (2012) [2]                              | Cryotherapy versus no cryotherapy     | 23                                   | 22                                   | Overall mean (SE) of oral mucositis severity for the cryotherapy arm significantly lower than that for the control group: 0.43 (0.12) vs 1.14 (0.12); P<0.001 on a 0-4 scale                                                                                                                                                     | Overall mean (SE) mucositis-related pain score for the cryotherapy arm significantly lower than that for the control group: 0.30 (0.23) vs 1.64 (0.24); P < 0.001 on a 0-10 scale | Four participants experienced teeth sensitivity and complained of chills during cryotherapy, did not deter completion of therapy                         |
| Sorensen (2008) [3]                              | Cryotherapy versus oral rinse         | 67                                   | 66                                   | Frequency of grade 3 or 4 oral mucositis was 10% in cryotherapy arm and 32% in saline rinse control group (P<0.005)                                                                                                                                                                                                              | Not reported                                                                                                                                                                      | No significant differences with respect to compliance or to side effects such as headache or taste disturbances. No effects on teeth                     |
| Svanberg (2007) [4] (companion papers: [5], [6]) | Cryotherapy versus no cryotherapy     | 39                                   | 39                                   | Auto: Cryotherapy significantly lower mucositis score on day 10 (1.6±1.9 vs 4.3±5.7; P=0.042)<br>Allo: Cryotherapy significantly lower mucositis score on day 16 (3.7±1.8 vs 11.6±6.8; P=0.021)                                                                                                                                  | No significant difference in pain between cryotherapy and control arms for either auto or allo group                                                                              | Seven patients (18%) found oral cryotherapy unpleasant, and among those, four (10%) found it very unpleasant, mostly because of shooting pain from teeth |
| Gori (2007) [7]                                  | Cryotherapy versus no cryotherapy     | 62                                   | 60                                   | Incidence of grade 3–4 oral mucositis comparable (47% in cryotherapy arm vs. 53% in control group; P=0.46). Maximum mean mucositis score comparable (1.98±1.12 in cryotherapy arm vs 2.13±1.24 in control group; P=0.56). Duration of mucositis among patients with either grade 3–4 or grade 2–4 mucositis was comparable       | Not reported                                                                                                                                                                      | Not reported                                                                                                                                             |
| Papadeas (2007) [8]                              | Cryotherapy versus no cryotherapy     | 36                                   | 40                                   | Percentage patients free from oral toxicity higher in cryotherapy arm (P<0.01) according to physicians' evaluation in all three chemotherapy cycles                                                                                                                                                                              | Not reported                                                                                                                                                                      | Mouth numbness or headache (n=6); did not deter cryotherapy                                                                                              |
| Lilleby (2006) [9]                               | Cryotherapy versus warm saline rinses | 21                                   | 19                                   | Cryotherapy group experienced less grade 3–4 mucositis than normal saline group (14 vs 74%, P=0.0005). Average number of days with grade 3 mucositis: 0.5 in cryotherapy group vs 4.6 in normal saline group (P=0.0001). Mean of average daily mucositis scores for cryotherapy vs. normal saline groups: 0.41 vs 1.06; P=0.0005 | Mean of average mouth pain scores 2.7 for normal saline vs 0.6 for cryotherapy groups (P=0.003)                                                                                   | Some patients complained of coldness and stopped using ice chips                                                                                         |
| Baydar (2005) [10]                               | Cryotherapy versus no cryotherapy     | 45                                   | 54                                   | Development of mucositis correlated only with cryotherapy in logistic regression: OR=11.5; 95% CI=3.2 to 41.9; P=0.001                                                                                                                                                                                                           | Not reported                                                                                                                                                                      | No local or systemic side effects due to cryotherapy                                                                                                     |

| First Author (Year)      | COMPARISONS                       | OUTCOMES                             |                                      |                                                                                                                                                                                                                                                     |                                                                                                                                                                            |                                                                                                                                                                                                          |
|--------------------------|-----------------------------------|--------------------------------------|--------------------------------------|-----------------------------------------------------------------------------------------------------------------------------------------------------------------------------------------------------------------------------------------------------|----------------------------------------------------------------------------------------------------------------------------------------------------------------------------|----------------------------------------------------------------------------------------------------------------------------------------------------------------------------------------------------------|
|                          |                                   | Number Received Intervention Group 1 | Number Received Intervention Group 2 | Description of Main Mucositis Findings                                                                                                                                                                                                              | Description of Main Pain Findings                                                                                                                                          | Description of Adverse Events                                                                                                                                                                            |
| Karagozoglul (2005) [11] | Cryotherapy versus no cryotherapy | 30                                   | 30                                   | Patient-judged: Rate of mucositis 36.7% with cryotherapy and 90.0% in control group; P<0.05. Physician-judged: Rate of mucositis 10.0% with cryotherapy and 50.0% in control group; P<0.05                                                          | Not reported                                                                                                                                                               | Not reported                                                                                                                                                                                             |
| Nikoletti (2005) [12]    | Cryotherapy versus no cryotherapy | NR                                   | NR                                   | Standard care vs cryotherapy: OAG: OR 3.26, 95% CI 1.55 to 6.90; P=0.002. WCCNR: OR 3.23, 95% CI 1.19 to 9.09; P=0.021                                                                                                                              | Cryotherapy more effective than standard care in reducing average reported pain (P=0.009)                                                                                  | Nausea, sensitivity and headache with cryotherapy (n = 5)                                                                                                                                                |
| Cascinu (1994) [13]      | Cryotherapy versus no cryotherapy | 44                                   | 40                                   | Mucositis significantly reduced by cryotherapy with first cycle of therapy (mean score for cryotherapy 0.59 vs 1.1 for control group; P<0.05) and all chemotherapeutic courses (mean score for cryotherapy 0.36 vs 0.69 for control group; P< 0.05) | Not reported                                                                                                                                                               | Cryotherapy well tolerated by most patients. Two patients reported an "ice cream" headache resulting in cryotherapy refusal                                                                              |
| Rocke (1993) [14]        | Cryotherapy 60 versus 30 min      | 89                                   | 88                                   | Mean physician-judged mucositis grades 0.58 and 0.79 for 30 vs 60 minutes of cryotherapy (P=0.37). Mean patient-graded mucositis scores were 0.73 and 1.00 (P=0.09)                                                                                 | Not reported                                                                                                                                                               | Few subjects discontinued cryotherapy prematurely because of nausea, headache, or chill                                                                                                                  |
| Mahood (1991) [15]       | Cryotherapy versus no cryotherapy | 50                                   | 45                                   | Mean physician-judged mucositis grade for cryotherapy 0.9 vs 1.9 for control (P=0.0002). Mean patient-graded toxicity 1.1 for cryotherapy vs 2.4 for control (P=0.0001)                                                                             | Not reported                                                                                                                                                               | Cryotherapy well tolerated by most. Few patients noted mild, temporary mouth numbness or "ice cream headache" which rapidly resolved after cessation of cryotherapy. Some ascribed nausea to cryotherapy |
| Kakoei (2013) [16]       | Cryotherapy versus no cryotherapy | NR                                   | NR                                   | Mean pain intensity in the control group significantly increased with time (P<0.001), whereas cryotherapy group showed no significant change with time (P>0.05)                                                                                     | Patients' self-assessment in control group significantly higher oral discomfort with time (P=0.012) vs cryotherapy group with no significant changes during study (P>0.05) | Not reported                                                                                                                                                                                             |

Abbreviation: SE – standard error; auto- autologous; allo – allogeneic; OAG – Oral Assessment Guide; WCCNR - Western Consortium Cancer Nursing Research Scale; OR – odds ratio; CI – confidence interval

## REFERENCES

1. Katranci N, Ovayolu N, Ovayolu O, Sevinc A. Evaluation of the effect of cryotherapy in preventing oral mucositis associated with chemotherapy - a randomized controlled trial. *Eur J Oncol Nurs* 2012;**16**(4):339-44 doi: <http://dx.doi.org/10.1016/j.ejon.2011.07.008published> Online First: Epub Date]].
2. Salvador P, Azusano C, Wang L, Howell D. A pilot randomized controlled trial of an oral care intervention to reduce mucositis severity in stem cell transplant patients. *J Pain Symptom Manage* 2012;**44**(1):64-73 doi: <http://dx.doi.org/10.1016/j.jpainsymman.2011.08.012published> Online First: Epub Date]].
3. Sorensen JB, Skovsgaard T, Bork E, Damstrup L, Ingeberg S. Double-blind, placebo-controlled, randomized study of chlorhexidine prophylaxis for 5-fluorouracil-based chemotherapy-induced oral mucositis with nonblinded randomized comparison to oral cooling (cryotherapy) in gastrointestinal malignancies. *Cancer* 2008;**112**(7):1600-6 doi: <http://dx.doi.org/10.1002/cncr.23328published> Online First: Epub Date]].
4. Svanberg A, Birgegard G, Ohrn K. Oral cryotherapy reduces mucositis and opioid use after myeloablative therapy--a randomized controlled trial. *Supportive care in cancer : official journal of the Multinational Association of Supportive Care in Cancer* 2007;**15**(10):1155-61
5. Svanberg A, Ohrn K, Birgegard G. Five-year follow-up of survival and relapse in patients who received cryotherapy during high-dose chemotherapy for stem cell transplantation shows no safety concerns. *Eur J Cancer Care (Engl)* 2012;**21**(6):822-8 doi: <http://dx.doi.org/10.1111/ecc.12009published> Online First: Epub Date]].
6. Svanberg A, Ohrn K, Birgegard G. Oral cryotherapy reduces mucositis and improves nutrition - a randomised controlled trial. *J Clin Nurs* 2010;**19**(15-16):2146-51 doi: <http://dx.doi.org/10.1111/j.1365-2702.2010.03255.xpublished> Online First: Epub Date]].

7. Gori E, Arpinati M, Bonifazi F, et al. Cryotherapy in the prevention of oral mucositis in patients receiving low-dose methotrexate following myeloablative allogeneic stem cell transplantation: a prospective randomized study of the Gruppo Italiano Trapianto di Midollo Osseo nurses group. *Bone marrow transplantation* 2007;**39**(6):347-52 doi: 10.1038/sj.bmt.1705590published Online First: Epub Date]].
8. Papadeas E, Naxakis S, Riga M, Kalofonos C. Prevention of 5-fluorouracil-related stomatitis by oral cryotherapy: a randomized controlled study. *Eur J Oncol Nurs* 2007;**11**(1):60-5
9. Lilleby K, Garcia P, Gooley T, et al. A prospective, randomized study of cryotherapy during administration of high-dose melphalan to decrease the severity and duration of oral mucositis in patients with multiple myeloma undergoing autologous peripheral blood stem cell transplantation. *Bone marrow transplantation* 2006;**37**(11):1031-5
10. Baydar M, Dikilitas M, Sevinc A, Aydogdu I. Prevention of oral mucositis due to 5-fluorouracil treatment with oral cryotherapy. *J Natl Med Assoc* 2005;**97**(8):1161-4
11. Karagozoglu S, Filiz Ulusoy M. Chemotherapy: the effect of oral cryotherapy on the development of mucositis. *J Clin Nurs* 2005;**14**(6):754-65
12. Nikoletti S, Hyde S, Shaw T, Myers H, Kristjanson LJ. Comparison of plain ice and flavoured ice for preventing oral mucositis associated with the use of 5 fluorouracil. *J Clin Nurs* 2005;**14**(6):750-3
13. Cascinu S, Fedeli A, Fedeli SL, Catalano G. Oral cooling (cryotherapy), an effective treatment for the prevention of 5-fluorouracil-induced stomatitis. *Eur J Cancer B Oral Oncol* 1994;**30B**(4):234-6
14. Rocke LK, Loprinzi CL, Lee JK, et al. A randomized clinical trial of two different durations of oral cryotherapy for prevention of 5-fluorouracil-related stomatitis. *Cancer* 1993;**72**(7):2234-8

15. Mahood DJ, Dose AM, Loprinzi CL, et al. Inhibition of fluorouracil-induced stomatitis by oral cryotherapy. *Journal of clinical oncology : official journal of the American Society of Clinical Oncology* 1991;**9**(3):449-52
16. Kakoei S, Ghassemi A, Nakhaei NR. Effect of cryotherapy on oral mucositis in patients with head and neck cancers receiving radiotherapy. *Int J Radiat* 2013;**11**(2):117-20
