# Supplementary material for: Guideline for the prevention of oral and oropharyngeal mucositis in children receiving treatment for cancer or undergoing haematopoietic stem cell transplantation
Source: PubMed Central journal article supplement — BMJ Support Palliat Care. 2015 Mar 27;7(1):7–16. doi: 10.1136/bmjspcare-2014-000804 (PMC5339548; doi:10.1136/bmjspcare-2014-000804), 2015-03-27
Supplement: bmjspcare-2014-000804-s8.pdf [file bmjspcare-2014-000804-s8.pdf]

**APPENDIX 8: RANDOMIZED CONTROLLED TRIALS OF KERATINOCYTE GROWTH FACTOR FOR THE PREVENTION OF ORAL MUCOSITIS IN ADULT AND PEDIATRIC PATIENTS RECEIVING TREATMENT FOR CANCER OR UNDERGOING HEMATOPOIETIC STEM CELL TRANSPLANTATION – STUDY CHARACTERISTICS**

| <b>STUDY CHARACTERISTICS AND PARTICIPANTS</b>  |                 |      |                               |                             |                    |                              |                                                |                                      |                 |                                                               |                                          |
|------------------------------------------------|-----------------|------|-------------------------------|-----------------------------|--------------------|------------------------------|------------------------------------------------|--------------------------------------|-----------------|---------------------------------------------------------------|------------------------------------------|
| First Author (Year)                            | Enrollment Year |      | Country of Patient Enrollment | Pharma Sponsorship Declared | Total N Randomized | Age (Pediatric, Adult, Both) | Specific Cancer Diagnosis                      | Population Type (Cancer, HSCT, Both) | Transplant Type | Treatment (Chemo alone, Radiation alone, Both, Not specified) | Treatment Related to KGF                 |
|                                                | Start           | End  |                               |                             |                    |                              |                                                |                                      |                 |                                                               |                                          |
| Blijlevens (2013) [1]                          | 2006            | 2009 | Europe                        | Yes                         | 281                | Adult                        | Multiple myeloma                               | HSCT                                 | Auto            | Chemo alone                                                   | Melphalan                                |
| Jagasia (2012) [2]                             | 2005            | 2008 | US and Australia              | Yes                         | 155                | Adult                        | Hem malignancy                                 | HSCT                                 | Allo            | Both                                                          | Variable                                 |
| Le (2011) [3]                                  | 2005            | 2007 | North America and Europe      | Yes                         | 188                | Adult                        | Advanced head and neck cancer                  | Cancer                               | NA              | Both                                                          | Cisplatin, radiotherapy (no surgery)     |
| Henke (2011) [4]                               | 2005            | 2007 | Australia, Canada, Europe     | Yes                         | 186                | Adult                        | Advanced head and neck cancer                  | Cancer                               | NA              | Both                                                          | Cisplatin, radiotherapy (post-operative) |
| Vadhan-Raj (2010) [5]                          | 2005            | 2008 | US                            | Yes                         | 48                 | Both                         | Sarcoma                                        | Cancer                               | NA              | Chemo alone                                                   | Doxorubicin                              |
| Brizel (2008) [6]                              | 1999            | 2001 | Australia, Canada, US         | Yes                         | 100                | Adult                        | Advanced head and neck squamous cell carcinoma | Cancer                               | NA              | Both                                                          | Cisplatin, 5-FU, radiotherapy            |
| Rosen (2006) [7]                               | NR              | NR   | NR                            | Yes                         | 65                 | Adult                        | Metastatic colon cancer                        | Cancer                               | NA              | Chemo alone                                                   | 5-FU, leukovorin                         |
| Blazar (2006) [8]                              | NR              | NR   | US                            | Yes                         | 100                | Both                         | Hem malignancy                                 | HSCT                                 | Allo            | Both                                                          | Cyclophosphamide with TBI or busulphan   |
| Freytes (2004) [9]                             | NR              | NR   | US                            | Yes                         | 52                 | Adult                        | Hem malignancy                                 | HSCT                                 | Auto            | Both                                                          | Variable                                 |
| Spielberger (2004) [10](companion paper: [11]) | 2001            | 2002 | US                            | Yes                         | 214                | Adult                        | Hem malignancy                                 | HSCT                                 | Allo            | Both                                                          | Etoposide, cyclophosphamide, TBI         |
| Meropol (2003) [12]                            | NR              | NR   | US                            | Yes                         | 81                 | Adult                        | Metastatic colon or rectal cancer              | Cancer                               | NA              | Chemo alone                                                   | 5-FU, leukovorin                         |

Abbreviations: NR – not reported; NA – not applicable; pharma – pharmaceutical company; N – number; US – United States; HSCT – hematopoietic stem cell transplantation; hem- hematological; auto- autologous; allo – allogeneic; 5-FU – 5-fluorouracil; TBI – total body irradiation; KGF - keratinocyte growth factor

## REFERENCES

1. Blijlevens N, de Chateau M, Krivan G, et al. In a high-dose melphalan setting, palifermin compared with placebo had no effect on oral mucositis or related patient's burden. *Bone marrow transplantation* 2013;48(7):966-71 doi: <http://dx.doi.org/10.1038/bmt.2012.257published> Online First: Epub Date]].
2. Jagasia MH, Abonour R, Long GD, et al. Palifermin for the reduction of acute GVHD: a randomized, double-blind, placebo-controlled trial. *Bone marrow transplantation* 2012;47(10):1350-5 doi: <http://dx.doi.org/10.1038/bmt.2011.261published> Online First: Epub Date]].
3. Le Q-T, Kim HE, Schneider CJ, et al. Palifermin reduces severe mucositis in definitive chemoradiotherapy of locally advanced head and neck cancer: a randomized, placebo-controlled study. *Journal of clinical oncology : official journal of the American Society of Clinical Oncology* 2011;29(20):2808-14 doi: <http://dx.doi.org/10.1200/JCO.2010.32.4095published> Online First: Epub Date]].
4. Henke M, Alfonsi M, Foa P, et al. Palifermin decreases severe oral mucositis of patients undergoing postoperative radiochemotherapy for head and neck cancer: a randomized, placebo-controlled trial. *Journal of clinical oncology : official journal of the American Society of Clinical Oncology* 2011;29(20):2815-20 doi: <http://dx.doi.org/10.1200/JCO.2010.32.4103published> Online First: Epub Date]].
5. Vadhan-Raj S, Trent J, Patel S, et al. Single-dose palifermin prevents severe oral mucositis during multicycle chemotherapy in patients with cancer: a randomized trial.[Summary for patients in *Ann Intern Med*. 2010 Sep 21;153(6):I-44; PMID: 20855786]. *Ann Intern Med* 2010;153(6):358-67 doi: <http://dx.doi.org/10.7326/0003-4819-153-6-201009210-00003published> Online First: Epub Date]].

6. Brizel DM, Murphy BA, Rosenthal DI, et al. Phase II study of palifermin and concurrent chemoradiation in head and neck squamous cell carcinoma. *Journal of clinical oncology : official journal of the American Society of Clinical Oncology* 2008;26(15):2489-96 doi: <http://dx.doi.org/10.1200/JCO.2007.13.7349published> Online First: Epub Date]].
7. Rosen LS, Abdi E, Davis ID, et al. Palifermin reduces the incidence of oral mucositis in patients with metastatic colorectal cancer treated with fluorouracil-based chemotherapy. *Journal of clinical oncology : official journal of the American Society of Clinical Oncology* 2006;24(33):5194-200
8. Blazar BR, Weisdorf DJ, Defor T, et al. Phase 1/2 randomized, placebo-control trial of palifermin to prevent graft-versus-host disease (GVHD) after allogeneic hematopoietic stem cell transplantation (HSCT). *Blood* 2006;108(9):3216-22
9. Freytes CO, Ratanatharathorn V, Taylor C, et al. Phase I/II randomized trial evaluating the safety and clinical effects of repifermin administered to reduce mucositis in patients undergoing autologous hematopoietic stem cell transplantation. *Clin Cancer Res* 2004;10(24):8318-24
10. Spielberger R, Stiff P, Bensinger W, et al. Palifermin for oral mucositis after intensive therapy for hematologic cancers. *N Engl J Med* 2004;351(25):2590-8
11. Stiff PJ, Emmanouilides C, Bensinger WI, et al. Palifermin reduces patient-reported mouth and throat soreness and improves patient functioning in the hematopoietic stem-cell transplantation setting. *Journal of clinical oncology : official journal of the American Society of Clinical Oncology* 2006;24(33):5186-93
12. Meropol NJ, Somer RA, Gutheil J, et al. Randomized phase I trial of recombinant human keratinocyte growth factor plus chemotherapy: potential role as mucosal protectant. *Journal of clinical oncology : official journal of the American Society of Clinical Oncology* 2003;21(8):1452-
