# Supplementary material for: Guideline for the prevention of oral and oropharyngeal mucositis in children receiving treatment for cancer or undergoing haematopoietic stem cell transplantation
Source: PubMed Central journal article supplement — BMJ Support Palliat Care. 2015 Mar 27;7(1):7–16. doi: 10.1136/bmjspcare-2014-000804 (PMC5339548; doi:10.1136/bmjspcare-2014-000804), 2015-03-27
Supplement: bmjspcare-2014-000804-s9.pdf [file bmjspcare-2014-000804-s9.pdf]

**APPENDIX 9: RANDOMIZED CONTROLLED TRIALS OF KERATINOCYTE GROWTH FACTOR FOR THE PREVENTION OF ORAL MUCOSITIS IN ADULT AND PEDIATRIC PATIENTS RECEIVING TREATMENT FOR CANCER OR UNDERGOING HEMATOPOIETIC STEM CELL TRANSPLANTATION – METHODOLOGY**

| METHODOLOGY                                     |                  |                                                    |                                                             |                                                                       | RISK OF BIAS FOR RANDOMIZED CONTROL TRIALS |                                  |                                     |                            |                                                                                           |                                    |
|-------------------------------------------------|------------------|----------------------------------------------------|-------------------------------------------------------------|-----------------------------------------------------------------------|--------------------------------------------|----------------------------------|-------------------------------------|----------------------------|-------------------------------------------------------------------------------------------|------------------------------------|
| First Author (Year)                             | RCT or quasi-RCT | Study Design: (Parallel group, Cross-over, N-of-1) | Scales Used to Measure Mucositis                            | Frequency and Timing of Mucositis Assessment                          | Adequate sequence generation?              | Adequate allocation concealment? | Participants and personnel blinded? | Outcome assessors blinded? | Loss to follow-up is less than 20% and/or equally distributed between both interventions? | Study free of selective reporting? |
| Blijlevens (2013) [1]                           | RCT              | Parallel                                           | WHO                                                         | Daily from day 2 to day 32                                            | Yes                                        | Unclear                          | Yes                                 | Yes                        | Yes                                                                                       | Yes                                |
| Jagasia (2012) [2]                              | RCT              | Parallel                                           | WHO                                                         | First day of the conditioning regimen until discharge or day 28       | Unclear                                    | Unclear                          | Yes                                 | Yes                        | Yes                                                                                       | Yes                                |
| Le (2011) [3]                                   | RCT              | Parallel                                           | WHO                                                         | Twice weekly during chemo-radiotherapy for 15 weeks                   | Unclear                                    | Yes                              | Yes                                 | Yes                        | Yes                                                                                       | Yes                                |
| Henke (2011) [4]                                | RCT              | Parallel                                           | WHO                                                         | Twice-weekly during radio-chemotherapy for 15 weeks                   | Yes                                        | Yes                              | Yes                                 | Yes                        | Yes                                                                                       | Yes                                |
| Vadhan_Raj (2010) [5]                           | RCT              | Parallel                                           | WHO, CTCAE                                                  | Before chemotherapy and days 10, 12 and 14                            | Yes                                        | Yes                              | Yes                                 | Yes                        | Yes                                                                                       | Yes                                |
| Brizel (2008) [6]                               | RCT              | Parallel                                           | CTCAE v2.0 and RTOG                                         | Once weekly for 12 weeks, weeks 14, 16, 18 and 20                     | Unclear                                    | Unclear                          | Yes                                 | Yes                        | Yes                                                                                       | Yes                                |
| Rosen (2006) [7]                                | RCT              | Parallel                                           | WHO, OMDQ                                                   | Baseline, days 1, 4, 8, 12, 15, and at the end of both cycles 1 and 2 | Unclear                                    | Unclear                          | Yes                                 | Yes                        | Yes                                                                                       | Yes                                |
| Blazar (2006) [8]                               | RCT              | Parallel                                           | WHO                                                         | 3 times per week during hospitalization                               | Unclear                                    | Unclear                          | Yes                                 | Yes                        | Yes                                                                                       | Yes                                |
| Freytes (2004) [9]                              | RCT              | Parallel                                           | CTCAE, OMAS                                                 | Day 0 and three times per week until mucositis resolved               | Unclear                                    | Unclear                          | Yes                                 | Yes                        | Yes                                                                                       | Yes                                |
| Spielberger (2004) [10] (companion paper: [11]) | RCT              | Parallel                                           | WHO, RTOG, Western Consortium Cancer Nursing Research Scale | Daily for 28 days after HSCT                                          | Unclear                                    | Unclear                          | Yes                                 | Yes                        | Yes                                                                                       | Yes                                |
| Meropol (2003) [12]                             | RCT              | Parallel                                           | WHO                                                         | Days 1, 4, 8, 15, and 28 after chemotherapy                           | Unclear                                    | Unclear                          | Yes                                 | Yes                        | Yes                                                                                       | Yes                                |

Abbreviations: RCT – randomized controlled trial; WHO – World Health Organization; CTCAE – Common Terminology Criteria for Adverse Events; RTOG – Radiation Therapy Oncology Group; OMDQ – Oral Mucositis Daily Questionnaire; HSCT – hematopoietic stem cell transplantation

## REFERENCES

1. Blijlevens N, de Chateau M, Krivan G, et al. In a high-dose melphalan setting, palifermin compared with placebo had no effect on oral mucositis or related patient's burden. *Bone marrow transplantation* 2013;**48**(7):966-71 doi: <http://dx.doi.org/10.1038/bmt.2012.257published> Online First: Epub Date]].
2. Jagasia MH, Abonour R, Long GD, et al. Palifermin for the reduction of acute GVHD: a randomized, double-blind, placebo-controlled trial. *Bone marrow transplantation* 2012;**47**(10):1350-5 doi: <http://dx.doi.org/10.1038/bmt.2011.261published> Online First: Epub Date]].
3. Le Q-T, Kim HE, Schneider CJ, et al. Palifermin reduces severe mucositis in definitive chemoradiotherapy of locally advanced head and neck cancer: a randomized, placebo-controlled study. *Journal of clinical oncology : official journal of the American Society of Clinical Oncology* 2011;**29**(20):2808-14 doi: <http://dx.doi.org/10.1200/JCO.2010.32.4095published> Online First: Epub Date]].
4. Henke M, Alfonsi M, Foa P, et al. Palifermin decreases severe oral mucositis of patients undergoing postoperative radiochemotherapy for head and neck cancer: a randomized, placebo-controlled trial. *Journal of clinical oncology : official journal of the American Society of Clinical Oncology* 2011;**29**(20):2815-20 doi: <http://dx.doi.org/10.1200/JCO.2010.32.4103published> Online First: Epub Date]].
5. Vadhan-Raj S, Trent J, Patel S, et al. Single-dose palifermin prevents severe oral mucositis during multicycle chemotherapy in patients with cancer: a randomized trial.[Summary for patients in *Ann Intern Med*. 2010 Sep 21;153(6):I-44; PMID: 20855786]. *Ann Intern Med* 2010;**153**(6):358-67 doi: <http://dx.doi.org/10.7326/0003-4819-153-6-201009210-00003published> Online First: Epub Date]].

6. Brizel DM, Murphy BA, Rosenthal DI, et al. Phase II study of palifermin and concurrent chemoradiation in head and neck squamous cell carcinoma. *Journal of clinical oncology : official journal of the American Society of Clinical Oncology* 2008;**26**(15):2489-96 doi: <http://dx.doi.org/10.1200/JCO.2007.13.7349published> Online First: Epub Date]].
7. Rosen LS, Abdi E, Davis ID, et al. Palifermin reduces the incidence of oral mucositis in patients with metastatic colorectal cancer treated with fluorouracil-based chemotherapy. *Journal of clinical oncology : official journal of the American Society of Clinical Oncology* 2006;**24**(33):5194-200
8. Blazar BR, Weisdorf DJ, Defor T, et al. Phase 1/2 randomized, placebo-control trial of palifermin to prevent graft-versus-host disease (GVHD) after allogeneic hematopoietic stem cell transplantation (HSCT). *Blood* 2006;**108**(9):3216-22
9. Freytes CO, Ratanatharathorn V, Taylor C, et al. Phase I/II randomized trial evaluating the safety and clinical effects of repifermin administered to reduce mucositis in patients undergoing autologous hematopoietic stem cell transplantation. *Clin Cancer Res* 2004;**10**(24):8318-24
10. Spielberger R, Stiff P, Bensinger W, et al. Palifermin for oral mucositis after intensive therapy for hematologic cancers. *N Engl J Med* 2004;**351**(25):2590-8
11. Stiff PJ, Emmanouilides C, Bensinger WI, et al. Palifermin reduces patient-reported mouth and throat soreness and improves patient functioning in the hematopoietic stem-cell transplantation setting. *Journal of clinical oncology : official journal of the American Society of Clinical Oncology* 2006;**24**(33):5186-93
12. Meropol NJ, Somer RA, Gutheil J, et al. Randomized phase I trial of recombinant human keratinocyte growth factor plus chemotherapy: potential role as mucosal protectant. *Journal of clinical oncology : official journal of the American Society of Clinical Oncology* 2003;**21**(8):1452-
