# Supplementary material for: Guideline for the prevention of oral and oropharyngeal mucositis in children receiving treatment for cancer or undergoing haematopoietic stem cell transplantation
Source: PubMed Central journal article supplement — BMJ Support Palliat Care. 2015 Mar 27;7(1):7–16. doi: 10.1136/bmjspcare-2014-000804 (PMC5339548; doi:10.1136/bmjspcare-2014-000804), 2015-03-27
Supplement: bmjspcare-2014-000804-s10.pdf [file bmjspcare-2014-000804-s10.pdf]

**APPENDIX 10: RANDOMIZED CONTROLLED TRIALS OF KERATINOCYTE GROWTH FACTOR FOR THE PREVENTION OF ORAL MUCOSITIS IN ADULT AND PEDIATRIC PATIENTS RECEIVING TREATMENT FOR CANCER OR UNDERGOING HEMATOPOIETIC STEM CELL TRANSPLANTATION – OUTCOMES**

| First Author<br>(Year)   | COMPARISONS                      | OUTCOMES                                      |                                               |                                                                                                                                                                                         |                                                                                                     |                                                                                                                                                                                                                                                                                                                                                                                  |
|--------------------------|----------------------------------|-----------------------------------------------|-----------------------------------------------|-----------------------------------------------------------------------------------------------------------------------------------------------------------------------------------------|-----------------------------------------------------------------------------------------------------|----------------------------------------------------------------------------------------------------------------------------------------------------------------------------------------------------------------------------------------------------------------------------------------------------------------------------------------------------------------------------------|
|                          |                                  | Number<br>Received<br>Intervention<br>Group 1 | Number<br>Received<br>Intervention<br>Group 2 | Description of Main Mucositis Findings                                                                                                                                                  | Description of Main Pain Findings                                                                   | Description of Adverse Events                                                                                                                                                                                                                                                                                                                                                    |
| Blijlevens<br>(2013) [1] | KGF (pre-post)<br>versus placebo | 224                                           | 57                                            | No significant difference in maximum severity of oral mucositis between placebo and KGF given either pre-/post HSCT (OR 0.7, 95% CI 0.4 to 1.3) or pre-HSCT (OR 1.2, 95% CI 0.6 to 2.4) | Area under curve for MTS not significantly different between placebo and pre-/post HSCT or pre-HSCT | 17/224 adverse events leading to KGF discontinuation vs 1/57 with placebo. 1 fatal adverse event with KGF vs 0 with placebo                                                                                                                                                                                                                                                      |
| Jagasia<br>(2012) [2]    | KGF (pre-post)<br>versus placebo | 77                                            | 78                                            | Incidence of grade 3-4 oral mucositis (73% placebo vs 81% KGF) similar between groups                                                                                                   | Not reported                                                                                        | Study drug-related adverse events 23 (32%) placebo vs 31 (40%) KGF. Most commonly reported treatment-related adverse events: skin/subcutaneous such as rash, pruritus and erythema                                                                                                                                                                                               |
| Le (2011) [3]            | KGF versus<br>placebo            | 94                                            | 94                                            | Incidence of severe oral mucositis significantly lower for KGF than placebo (54% vs 69%; P=0.041)                                                                                       | Average MTS scores in KGF vs. placebo arms (mean 1.7 vs 1.9) (NS)                                   | Adverse events similar between arms (98% KGF, 93%, placebo). Most common study drug-related adverse events rash, flushing and dysgeusia                                                                                                                                                                                                                                          |
| Henke<br>(2011) [4]      | KGF versus<br>placebo            | 92                                            | 94                                            | Incidence of severe oral mucositis significantly lower for KGF than placebo (51% vs 67%; P=0.027)                                                                                       | No difference in MTS between groups                                                                 | Adverse events with difference in incidence of at least 5% between KGF and placebo arms: dysphagia (35% and 21%), dehydration (6% and 14%), leukopenia (13% and 21%), insomnia (5% and 13%), fatigue (8% and 15%), diarrhea (12% and 5%), mucosal inflammation (4% and 11%), asthenia (14% and 8%), headache (10% and 4%), abdominal pain (8% and 2%), and back pain (6% and 1%) |
| Vadhan Raj<br>(2010) [5] | KGF versus<br>placebo            | 32                                            | 16                                            | KGF reduced cumulative incidence of grade 2 or higher WHO mucositis (44% vs 88%; P<0.001) and grade 3 or 4 mucositis (13% vs 51%; P=0.002)                                              | Mouth pain scores significantly lower with KGF (1 vs 5; P=0.002)                                    | Main adverse effects thickening of oral mucosa (72% KGF vs 31% placebo; P=0.007) and altered taste                                                                                                                                                                                                                                                                               |
| Brizel<br>(2008) [6]     | KGF versus<br>placebo            | 67                                            | 32                                            | Median duration grade 2 or higher mucositis non-significantly shorter for KGF than placebo (6.5 vs 8.1 weeks; P=0.157)                                                                  | Not reported                                                                                        | Type, incidence, and severity of adverse events similar between treatment groups                                                                                                                                                                                                                                                                                                 |
| Rosen<br>(2006) [7]      | KGF versus<br>placebo            | 28                                            | 36                                            | During first chemotherapy cycle, incidence of WHO grade 2 or higher mucositis lower with KGF than with placebo (29% vs 61%; P=0.016)                                                    | Cycle 1, MTS scores significantly lower with KGF (P=0.005)                                          | Oral-related adverse events more frequent in KGF vs placebo. During cycle 1, 50% KGF patients oral-related adverse event vs 33% placebo (P=0.13)                                                                                                                                                                                                                                 |

| First Author<br>(Year)                                  | COMPARISONS        | OUTCOMES                                      |                                               |                                                                                                                                                                                                                                  |                                                                                                                                                                                      |                                                                                                                                                                      |
|---------------------------------------------------------|--------------------|-----------------------------------------------|-----------------------------------------------|----------------------------------------------------------------------------------------------------------------------------------------------------------------------------------------------------------------------------------|--------------------------------------------------------------------------------------------------------------------------------------------------------------------------------------|----------------------------------------------------------------------------------------------------------------------------------------------------------------------|
|                                                         |                    | Number<br>Received<br>Intervention<br>Group 1 | Number<br>Received<br>Intervention<br>Group 2 | Description of Main Mucositis Findings                                                                                                                                                                                           | Description of Main Pain Findings                                                                                                                                                    | Description of Adverse Events                                                                                                                                        |
| Blazar<br>(2006) [8]                                    | KGF versus placebo | 69                                            | 31                                            | Difference in mean severity of oral mucositis significantly lower with KGF than with placebo (2.8 vs 2.3; P=0.01)                                                                                                                | Not reported                                                                                                                                                                         | Most adverse events similar frequencies in two groups. Skin reactions significantly more common with KGF (94% vs 68%; P<0.01)                                        |
| Freytes<br>(2004) [9]                                   | KGF versus placebo | 28                                            | 14                                            | Grade 2 to 4 mucositis 100% for placebo, 64% for 25 mcg/kg (P=0.041 vs placebo), and 50% for 50 mcg/kg (P=0.006 vs placebo). Worst OMAS scores 14.0, 14.1, and 9.6 respectively for placebo, 25 mcg/kg and 50 mcg/kg groups (NS) | Mean worst pain on swallowing score 4.6, 4.8, and 2.1 for the placebo, 25 mcg/kg, and 50 mcg/kg groups, respectively. Difference between 50 mcg/kg and placebo significant (P=0.044) | Adverse events similar for KGF and placebo groups                                                                                                                    |
| Spielberger<br>(2004)<br>[10](companion<br>paper: [11]) | KGF versus placebo | 106                                           | 106                                           | Incidence of WHO grade 3 or 4 mucositis 63% with KGF and 98% with placebo (P<0.001). Median duration of mucositis 3 days (range 0 to 22) with KGF vs 9 days (range 0 to 27) with placebo (P<0.001)                               | KGF associated with significant reduction in MTS (P<0.001)                                                                                                                           | Adverse events more often with KGF: skin and oral epithelium effects such as rash, pruritus, erythema, paresthesia, mouth and tongue disorders, and taste alteration |
| Meropol<br>(2003) [12]                                  | KGF versus placebo | 54                                            | 27                                            | Frequency grade 2 to 4 mucositis 43% with KGF compared with 67% with placebo (P=0.06)                                                                                                                                            | Area under the curve for mouth soreness: Placebo (mean 35.9; SE 7.6) vs. KGF (mean 30.3; SE 4.8)                                                                                     | Skin and oral events occurred in 13 of 18 patients treated with 60 and 80 mcg/kg of KGF and three of 11 patients treated with 40 mcg/kg                              |

Abbreviations: KGF – keratinocyte growth factor; HSCT – hematopoietic stem cell transplantation; OR – odds ratio; CI – confidence interval; MTS – Mouth and Throat Soreness; WHO – World Health Organization; OMAS – Oral Mucositis Assessment Scale; NS – not significant

## REFERENCES

1. Blijlevens N, de Chateau M, Krivan G, et al. In a high-dose melphalan setting, palifermin compared with placebo had no effect on oral mucositis or related patient's burden. *Bone marrow transplantation* 2013;**48**(7):966-71 doi: <http://dx.doi.org/10.1038/bmt.2012.257published> Online First: Epub Date]].
2. Jagasia MH, Abonour R, Long GD, et al. Palifermin for the reduction of acute GVHD: a randomized, double-blind, placebo-controlled trial. *Bone marrow transplantation* 2012;**47**(10):1350-5 doi: <http://dx.doi.org/10.1038/bmt.2011.261published> Online First: Epub Date]].
3. Le Q-T, Kim HE, Schneider CJ, et al. Palifermin reduces severe mucositis in definitive chemoradiotherapy of locally advanced head and neck cancer: a randomized, placebo-controlled study. *Journal of clinical oncology : official journal of the American Society of Clinical Oncology* 2011;**29**(20):2808-14 doi: <http://dx.doi.org/10.1200/JCO.2010.32.4095published> Online First: Epub Date]].
4. Henke M, Alfonsi M, Foa P, et al. Palifermin decreases severe oral mucositis of patients undergoing postoperative radiochemotherapy for head and neck cancer: a randomized, placebo-controlled trial. *Journal of clinical oncology : official journal of the American Society of Clinical Oncology* 2011;**29**(20):2815-20 doi: <http://dx.doi.org/10.1200/JCO.2010.32.4103published> Online First: Epub Date]].
5. Vadhan-Raj S, Trent J, Patel S, et al. Single-dose palifermin prevents severe oral mucositis during multicycle chemotherapy in patients with cancer: a randomized trial.[Summary for patients in Ann Intern Med. 2010 Sep 21;153(6):l-44; PMID: 20855786]. *Ann Intern Med* 2010;**153**(6):358-67 doi: <http://dx.doi.org/10.7326/0003-4819-153-6-201009210-00003published> Online First: Epub Date]].
6. Brizel DM, Murphy BA, Rosenthal DI, et al. Phase II study of palifermin and concurrent chemoradiation in head and neck squamous cell carcinoma. *Journal of clinical oncology : official*

*journal of the American Society of Clinical Oncology* 2008;**26**(15):2489-96 doi:  
<http://dx.doi.org/10.1200/JCO.2007.13.7349>published Online First: Epub Date]].

7. Rosen LS, Abdi E, Davis ID, et al. Palifermin reduces the incidence of oral mucositis in patients with metastatic colorectal cancer treated with fluorouracil-based chemotherapy. *Journal of clinical oncology : official journal of the American Society of Clinical Oncology* 2006;**24**(33):5194-200
8. Blazar BR, Weisdorf DJ, Defor T, et al. Phase 1/2 randomized, placebo-control trial of palifermin to prevent graft-versus-host disease (GVHD) after allogeneic hematopoietic stem cell transplantation (HSCT). *Blood* 2006;**108**(9):3216-22
9. Freytes CO, Ratanatharathorn V, Taylor C, et al. Phase I/II randomized trial evaluating the safety and clinical effects of repifermin administered to reduce mucositis in patients undergoing autologous hematopoietic stem cell transplantation. *Clin Cancer Res* 2004;**10**(24):8318-24
10. Spielberger R, Stiff P, Bensinger W, et al. Palifermin for oral mucositis after intensive therapy for hematologic cancers. *N Engl J Med* 2004;**351**(25):2590-8
11. Stiff PJ, Emmanouilides C, Bensinger WI, et al. Palifermin reduces patient-reported mouth and throat soreness and improves patient functioning in the hematopoietic stem-cell transplantation setting. *Journal of clinical oncology : official journal of the American Society of Clinical Oncology* 2006;**24**(33):5186-93
12. Meropol NJ, Somer RA, Gutheil J, et al. Randomized phase I trial of recombinant human keratinocyte growth factor plus chemotherapy: potential role as mucosal protectant. *Journal of clinical oncology : official journal of the American Society of Clinical Oncology* 2003;**21**(8):1452-8
