# Supplementary material for: Guideline for the prevention of oral and oropharyngeal mucositis in children receiving treatment for cancer or undergoing haematopoietic stem cell transplantation
Source: PubMed Central journal article supplement — BMJ Support Palliat Care. 2015 Mar 27;7(1):7–16. doi: 10.1136/bmjspcare-2014-000804 (PMC5339548; doi:10.1136/bmjspcare-2014-000804), 2015-03-27
Supplement: bmjspcare-2014-000804-s11.pdf [file bmjspcare-2014-000804-s11.pdf]

**APPENDIX 11: RANDOMIZED CONTROLLED TRIALS OF ANY INTERVENTION FOR THE PREVENTION OF ORAL MUCOSITIS IN PEDIATRIC PATIENTS RECEIVING TREATMENT FOR CANCER OR UNDERGOING HEMATOPOIETIC STEM CELL TRANSPLANTATION – STUDY CHARACTERISTICS**

| <b>STUDY CHARACTERISTICS AND PARTICIPANTS</b>  |                 |      |                               |                             |                    |             |                           |                                      |                 |                                                               |                                              |
|------------------------------------------------|-----------------|------|-------------------------------|-----------------------------|--------------------|-------------|---------------------------|--------------------------------------|-----------------|---------------------------------------------------------------|----------------------------------------------|
| First Author (Year)                            | Enrollment Year |      | Country of Patient Enrollment | Pharma Sponsorship Declared | Total N Randomized | Age Range   | Specific Cancer Diagnosis | Population Type (Cancer, HSCT, Both) | Transplant Type | Treatment (Chemo alone, Radiation alone, Both, Not specified) | Treatment Regimen in Related to Intervention |
|                                                | Start           | End  |                               |                             |                    |             |                           |                                      |                 |                                                               |                                              |
| Patte (2002) [1]                               | 1994            | 1996 | France                        | No                          | 149                | NR          | NHL                       | Cancer                               | NA              | Chemo                                                         | COPADM                                       |
| Michel (2000) [2]                              | 1993            | 1998 | France                        | No                          | 67                 | NR          | High risk ALL             | Cancer                               | NA              | Chemo                                                         | R3 and COPADM for 6 cycles total             |
| Lehrnbecher (2007) [3]                         | 1998            | 2003 | Germany                       | No                          | 317                | 0 to 18     | AML                       | Cancer                               | NA              | Chemo                                                         | Induction AML                                |
| Ladenstein (2010) [4]                          | 2002            | 2005 | 16 European countries         | Yes                         | 239                | 1 to 17     | High risk neuroblastoma   | Cancer                               | NA              | Chemo                                                         | Rapid COJEC                                  |
| Cesaro (2013) [5]                              | 2007            | 2011 | Italy                         | No                          | 61                 | 1.1 to 16.8 | Various                   | HSCT                                 | Auto            | Both                                                          | Various                                      |
| Fox (2009) [6]                                 | 2000            | 2005 | US                            | Yes                         | 34                 | 3.8 to 25.8 | Sarcoma                   | Cancer                               | NA              | Both                                                          | VDC and IE                                   |
| Wexler (1996) [7]                              | NR              | NR   | US                            | No                          | 37                 | 1 to 24     | Sarcoma                   | Cancer                               | NA              | Both                                                          | NCI protocol 86C 169                         |
| Uderzo (2011) [8]                              | 2005            | 2008 | Italy                         | No                          | 120                | 0.4 to 18.6 | Hem malignancy            | HSCT                                 | Allo            | Both                                                          | Timing based on HSCT, not conditioning       |
| Aquino (2005) [9]                              | 1998            | 2002 | US                            | No                          | 130                | NR          | Various                   | HSCT                                 | Auto, allo      | Both                                                          | Various                                      |
| Ward (2009) [10]                               | 1999            | 2005 | UK                            | Yes                         | 76                 | 1 to 22     | Various                   | Cancer                               | NA              | Chemo                                                         | Various                                      |
| Sencer (2012) [11]                             | 2004            | 2006 | US, Israel                    | No                          | 195                | 3 to 25     | Various                   | HSCT                                 | Auto, allo      | Not specified                                                 | Timing based on HSCT, not conditioning       |
| Oberbaum (2001) [12] (companion paper: [13])   | NR              | NR   | Israel                        | No                          | 32                 | 3 to 25     | Various                   | HSCT                                 | Auto, allo      | Not specified                                                 | Various                                      |
| Abramoff (2008) [14]                           | 2003            | 2003 | Brazil                        | Yes                         | 22                 | 7 to 23     | Osteosarcoma and ALL      | Cancer                               | NA              | Chemo                                                         | Various                                      |
| Cruz (2007) [15]                               | 2003            | 2005 | Brazil                        | Yes                         | 62                 | 3 to 18     | Various                   | Both                                 | Unclear         | Chemo                                                         | Various                                      |
| Raether (1989) [16]                            | 1986            | 1987 | US                            | Yes                         | 47                 | 1.6 to 21.5 | Various                   | HSCT                                 | Auto, allo      | Both                                                          | Various                                      |
| Cheng (2004) [17] (companion papers:[18] [19]) | 2000            | 2001 | Hong Kong                     | No                          | 40                 | 6 to 16     | Various                   | Cancer                               | NA              | Chemo                                                         | Various                                      |
| Shenep (1988) [20]                             | 1983            | 1987 | US                            | Yes                         | 48                 | NR          | AML                       | Cancer                               | NA              | Chemo                                                         | Induction AML                                |
| Sung (2007) [21]                               | 2001            | 2004 | Canada                        | Yes                         | 45                 | 6.4 to 15.1 | Various                   | Cancer                               | NA              | Chemo                                                         | Doxorubicin                                  |

## STUDY CHARACTERISTICS AND PARTICIPANTS

| First Author (Year)          | Enrollment Year |      | Country of Patient Enrollment | Pharma Sponsorship Declared | Total N Randomized | Age Range   | Specific Cancer Diagnosis | Population Type (Cancer, HSCT, Both) | Transplant Type | Treatment (Chemo alone, Radiation alone, Both, Not specified) | Treatment Regimen in Related to Intervention |
|------------------------------|-----------------|------|-------------------------------|-----------------------------|--------------------|-------------|---------------------------|--------------------------------------|-----------------|---------------------------------------------------------------|----------------------------------------------|
|                              | Start           | End  |                               |                             |                    |             |                           |                                      |                 |                                                               |                                              |
| de Koning (2007) [22]        | 2001            | 2004 | Netherlands                   | Yes                         | 30                 | 1 to 14     | Various                   | Cancer                               | NA              | Chemo                                                         | Various                                      |
| Gandemer (2007) [23]         | 1999            | 2002 | France                        | Yes                         | 145                | 5.2 to 18.7 | Various                   | Both                                 | Auto, allo      | Chemo                                                         | Various                                      |
| Rojas de Morales (2001) [24] | 1998            | 1999 | Venezuela                     | Yes                         | 16                 | 5 to 12     | ALL or lymphoma           | Cancer                               | NA              | Chemo                                                         | Not stated                                   |

Abbreviations: NR - not reported; NA - not applicable; pharma – pharmaceutical company; N – number; HSCT - hematopoietic stem cell transplantation; chemo – chemotherapy; NHL – non-Hodgkin’s lymphoma; ALL - acute lymphoblastic leukemia; AML – acute myeloid leukemia; auto – autologous; allo – allogeneic; hem – hematological; COPADM - cyclophosphamide, vincristine, prednisone, doxorubicin and methotrexate; R3 - high-dose cytarabine, etoposide and dexamethasone; COJEC - cisplatin, vincristine, carboplatin, etoposide and cyclophosphamide; VDC - vincristine, doxorubicin and cyclophosphamide; IE – ifosfamide and etoposide; NCI – National Cancer Institute; US – United States; UK – United Kingdom

## REFERENCES

1. Patte C, Laplanche A, Bertozzi AI, et al. Granulocyte colony-stimulating factor in induction treatment of children with non-Hodgkin's lymphoma: a randomized study of the French Society of Pediatric Oncology. *Journal of clinical oncology : official journal of the American Society of Clinical Oncology* 2002;**20**(2):441-8
2. Michel G, Landman-Parker J, Auclerc MF, et al. Use of recombinant human granulocyte colony-stimulating factor to increase chemotherapy dose-intensity: a randomized trial in very high-risk childhood acute lymphoblastic leukemia. *Journal of clinical oncology : official journal of the American Society of Clinical Oncology* 2000;**18**(7):1517-24
3. Lehrnbecher T, Zimmermann M, Reinhardt D, Dworzak M, Stary J, Creutzig U. Prophylactic human granulocyte colony-stimulating factor after induction therapy in pediatric acute myeloid leukemia. *Blood* 2007;**109**(3):936-43 doi: 10.1182/blood-2006-07-035915published Online First: Epub Date]].
4. Ladenstein R, Valteau-Couanet D, Brock P, et al. Randomized Trial of prophylactic granulocyte colony-stimulating factor during rapid COJEC induction in pediatric patients with high-risk neuroblastoma: the European HR-NBL1/SIOPEN study. *Journal of clinical oncology : official journal of the American Society of Clinical Oncology* 2010;**28**(21):3516-24 doi: 10.1200/JCO.2009.27.3524published Online First: Epub Date]].
5. Cesaro S, Nesi F, Tridello G, et al. A randomized, non-inferiority study comparing efficacy and safety of a single dose of pegfilgrastim versus daily filgrastim in pediatric patients after autologous peripheral blood stem cell transplant. *PloS one* 2013;**8**(1):e53252 doi: 10.1371/journal.pone.0053252published Online First: Epub Date]].
6. Fox E, Widemann BC, Hawkins DS, et al. Randomized trial and pharmacokinetic study of pegfilgrastim versus filgrastim after dose-intensive chemotherapy in young adults and children with sarcomas. *Clin Cancer Res* 2009;**15**(23):7361-7 doi: 10.1158/1078-0432.CCR-09-0761published Online First: Epub Date]].

7. Wexler LH, Weaver-McClure L, Steinberg SM, et al. Randomized trial of recombinant human granulocyte-macrophage colony-stimulating factor in pediatric patients receiving intensive myelosuppressive chemotherapy. *Journal of clinical oncology : official journal of the American Society of Clinical Oncology* 1996;**14**(3):901-10
8. Uderzo C, Rebora P, Marrocco E, et al. Glutamine-enriched nutrition does not reduce mucosal morbidity or complications after stem-cell transplantation for childhood malignancies: a prospective randomized study. *Transplantation* 2011;**91**(12):1321-5 doi: 10.1097/TP.0b013e31821ab959published Online First: Epub Date]].
9. Aquino VM, Harvey AR, Garvin JH, et al. A double-blind randomized placebo-controlled study of oral glutamine in the prevention of mucositis in children undergoing hematopoietic stem cell transplantation: a pediatric blood and marrow transplant consortium study. *Bone marrow transplantation* 2005;**36**(7):611-6 doi: 10.1038/sj.bmt.1705084published Online First: Epub Date]].
10. Ward E, Smith M, Henderson M, et al. The effect of high-dose enteral glutamine on the incidence and severity of mucositis in paediatric oncology patients. *European journal of clinical nutrition* 2009;**63**(1):134-40 doi: 10.1038/sj.ejcn.1602894published Online First: Epub Date]].
11. Sencer SF, Zhou T, Freedman LS, et al. Traumeel S in preventing and treating mucositis in young patients undergoing SCT: a report of the Children's Oncology Group. *Bone marrow transplantation* 2012;**47**(11):1409-14 doi: 10.1038/bmt.2012.30published Online First: Epub Date]].
12. Oberbaum M, Yaniv I, Ben-Gal Y, et al. A randomized, controlled clinical trial of the homeopathic medication TRAUMEEL S in the treatment of chemotherapy-induced stomatitis in children undergoing stem cell transplantation. *Cancer* 2001;**92**(3):684-90
13. Oberbaum M, Yaniv I, Ben-Gal Y, et al. A randomized, controlled clinical trial of the homeopathic medication Traumeel S in the treatment of chemotherapy-induced stomatitis in children undergoing stem cell transplantation. [German]. *Biologische Medizin* 2002;**31**(1):25-31

14. Abramoff MMF, Lopes NNF, Lopes LA, et al. Low-level laser therapy in the prevention and treatment of chemotherapy-induced oral mucositis in young patients. *Photomed Laser Surg* 2008;**26**(4):393-400 doi: <http://dx.doi.org/10.1089/pho.2007.2144published> Online First: Epub Date]].
15. Cruz LB, Ribeiro AS, Rech A, Rosa LGN, Castro CG, Jr., Brunetto AL. Influence of low-energy laser in the prevention of oral mucositis in children with cancer receiving chemotherapy. *Pediatr Blood Cancer* 2007;**48**(4):435-40
16. Raether D, Walker PO, Bostrum B, Weisdorf D. Effectiveness of oral chlorhexidine for reducing stomatitis in a pediatric bone marrow transplant population. *Pediatric dentistry* 1989;**11**(1):37-42
17. Cheng KK, Chang AM, Yuen MP. Prevention of oral mucositis in paediatric patients treated with chemotherapy; a randomised crossover trial comparing two protocols of oral care. *European journal of cancer* 2004;**40**(8):1208-16 doi: 10.1016/j.ejca.2003.10.023published Online First: Epub Date]].
18. Cheng KKF. Children's acceptance and tolerance of chlorhexidine and benzydamine oral rinses in the treatment of chemotherapy-induced oropharyngeal mucositis. *Eur J Oncol Nurs* 2004;**8**(4):341-9
19. Cheng KKF, Chang AM. Palliation of oral mucositis symptoms in pediatric patients treated with cancer chemotherapy. *Cancer Nurs* 2003;**26**(6):476-84
20. Shenep JL, Kalwinsky DK, Hutson PR, et al. Efficacy of oral sucralfate suspension in prevention and treatment of chemotherapy-induced mucositis. *The Journal of pediatrics* 1988;**113**(4):758-63
21. Sung L, Tomlinson GA, Greenberg ML, et al. Serial controlled N-of-1 trials of topical vitamin E as prophylaxis for chemotherapy-induced oral mucositis in paediatric patients. *European journal of cancer* 2007;**43**(8):1269-75 doi: 10.1016/j.ejca.2007.02.001published Online First: Epub Date]].
22. de Koning BA, Philipsen-Geerling B, Hoijer M, Hahlen K, Buller HA, Pieters R. Protection against chemotherapy induced mucositis by TGF-beta(2) in childhood cancer patients: results from a randomized cross-over study. *Pediatr Blood Cancer* 2007;**48**(5):532-9 doi: 10.1002/pbc.20910published Online First: Epub Date]].

23. Gandemer V, Le Deley MC, Dollfus C, et al. Multicenter randomized trial of chewing gum for preventing oral mucositis in children receiving chemotherapy. *Journal of pediatric hematology/oncology* 2007;**29**(2):86-94 doi: 10.1097/MPH.0b013e318030a3e4published Online First: Epub Date]].
24. Rojas de Morales T, Zambrano O, Rivera L, et al. Oral-disease prevention in children with cancer: testing preventive protocol effectiveness. *Medicina Oral* 2001;**6**(5):326-34
