# Supplementary material for: Guideline for the prevention of oral and oropharyngeal mucositis in children receiving treatment for cancer or undergoing haematopoietic stem cell transplantation
Source: PubMed Central journal article supplement — BMJ Support Palliat Care. 2015 Mar 27;7(1):7–16. doi: 10.1136/bmjspcare-2014-000804 (PMC5339548; doi:10.1136/bmjspcare-2014-000804), 2015-03-27
Supplement: bmjspcare-2014-000804-s12.pdf [file bmjspcare-2014-000804-s12.pdf]

**APPENDIX 12: RANDOMIZED CONTROLLED TRIALS OF ANY INTERVENTION FOR THE PREVENTION OF ORAL MUCOSITIS IN PEDIATRIC PATIENTS RECEIVING TREATMENT FOR CANCER OR UNDERGOING HEMATOPOIETIC STEM CELL TRANSPLANTATION – METHODOLOGY**

| METHODOLOGY                                      |                  |                                                    |                                          |                                                                                           | RISK OF BIAS FOR RANDOMIZED CONTROL TRIALS |                                  |                                     |                            |                                                                                           |                                    |
|--------------------------------------------------|------------------|----------------------------------------------------|------------------------------------------|-------------------------------------------------------------------------------------------|--------------------------------------------|----------------------------------|-------------------------------------|----------------------------|-------------------------------------------------------------------------------------------|------------------------------------|
| First Author (Year)                              | RCT or quasi-RCT | Study Design: (Parallel group, Cross-over, N-of-1) | Scales Used to Measure Mucositis         | Frequency and Timing of Mucositis Assessment                                              | Adequate sequence generation?              | Adequate allocation concealment? | Participants and personnel blinded? | Outcome assessors blinded? | Loss to follow-up is less than 20% and/or equally distributed between both interventions? | Study free of selective reporting? |
| Patte (2002) [1]                                 | RCT              | Parallel                                           | Unclear                                  | Unclear                                                                                   | Unclear                                    | Unclear                          | No                                  | No                         | Yes                                                                                       | Yes                                |
| Michel (2000) [2]                                | RCT              | Parallel                                           | Not reported                             | Unclear                                                                                   | Unclear                                    | Unclear                          | No                                  | No                         | Yes                                                                                       | Yes                                |
| Lehrnbecher (2007) [3]                           | RCT              | Parallel                                           | CTCAE v3.0                               | Unclear                                                                                   | Unclear                                    | Yes                              | No                                  | No                         | Yes                                                                                       | Yes                                |
| Ladenstein (2010) [4]                            | RCT              | Parallel                                           | CTCAE v2.0                               | Unclear                                                                                   | Yes                                        | Yes                              | No                                  | No                         | Yes                                                                                       | Yes                                |
| Cesaro (2013) [5]                                | RCT              | Parallel                                           | WHO                                      | Unclear                                                                                   | Yes                                        | Yes                              | No                                  | No                         | Yes                                                                                       | Yes                                |
| Fox (2009) [6]                                   | RCT              | Parallel                                           | CTCAE v2.0                               | Unclear                                                                                   | Unclear                                    | Yes                              | No                                  | No                         | Yes                                                                                       | Yes                                |
| Wexler (1996) [7]                                | RCT              | Parallel                                           | CTCAE                                    | Unclear                                                                                   | Unclear                                    | Unclear                          | No                                  | No                         | Yes                                                                                       | Yes                                |
| Uderzo (2011) [8]                                | RCT              | Parallel                                           | WHO                                      | Unclear                                                                                   | Yes                                        | Yes                              | Yes                                 | Yes                        | Yes                                                                                       | No                                 |
| Aquino (2005) [9]                                | RCT              | Parallel                                           | Modified Walsh scale                     | Daily until day 28 post HSCT or discharge                                                 | Yes                                        | Yes                              | Yes                                 | Yes                        | Yes                                                                                       | Yes                                |
| Ward (2009) [10]                                 | Quasi-RCT        | Cross-over                                         | CTCAE v2.0                               | Days 1 to 21, frequency unclear                                                           | No                                         | No                               | No                                  | No                         | No                                                                                        | Yes                                |
| Sencer (2012) [11]                               | RCT              | Parallel                                           | Modified Walsh scale, WHO                | Daily from day -1 to day 20 post HSCT                                                     | Unclear                                    | Unclear                          | Yes                                 | Yes                        | Yes                                                                                       | Yes                                |
| Oberbaum (2001) [12] (companion paper: [13])     | RCT              | Parallel                                           | WHO                                      | Every 2 days until no symptoms for 2 days, 14 days minimum after the start of study agent | Unclear                                    | Yes                              | Yes                                 | Yes                        | Yes                                                                                       | Yes                                |
| Abramoff (2008) [14]                             | RCT              | Parallel                                           | CTCAE v2.0                               | Before and after each laser application                                                   | Unclear                                    | Unclear                          | Yes                                 | Yes                        | Yes                                                                                       | No                                 |
| Cruz (2007) [15]                                 | RCT              | Parallel                                           | CTCAE v2.0                               | Days 1, 8 and 15                                                                          | Unclear                                    | Unclear                          | No                                  | Yes                        | Yes                                                                                       | Yes                                |
| Raether (1989) [16]                              | RCT              | Parallel                                           | Percentage of ulcerated mucosa           | Twice weekly from 8 days prior to HSCT until day 35 or discharge                          | Unclear                                    | Unclear                          | Yes                                 | Yes                        | Yes                                                                                       | Yes                                |
| Cheng (2004) [17] (companion papers: [18], [19]) | RCT              | Cross-over                                         | Modified Oral Assessment Guide, WHO, VAS | Twice weekly                                                                              | Unclear                                    | Unclear                          | No                                  | No                         | Yes                                                                                       | Yes                                |
| Shenep (1988) [20]                               | RCT              | Parallel                                           | Study-specific ulceration scale          | Twice weekly                                                                              | Yes                                        | Yes                              | Yes                                 | Yes                        | Yes                                                                                       | Yes                                |

| METHODOLOGY                  |                  |                                                    |                                  |                                                                                             | RISK OF BIAS FOR RANDOMIZED CONTROL TRIALS |                                  |                                     |                            |                                                                                           |                                    |
|------------------------------|------------------|----------------------------------------------------|----------------------------------|---------------------------------------------------------------------------------------------|--------------------------------------------|----------------------------------|-------------------------------------|----------------------------|-------------------------------------------------------------------------------------------|------------------------------------|
| First Author (Year)          | RCT or quasi-RCT | Study Design: (Parallel group, Cross-over, N-of-1) | Scales Used to Measure Mucositis | Frequency and Timing of Mucositis Assessment                                                | Adequate sequence generation?              | Adequate allocation concealment? | Participants and personnel blinded? | Outcome assessors blinded? | Loss to follow-up is less than 20% and/or equally distributed between both interventions? | Study free of selective reporting? |
| Sung (2007) [21]             | RCT              | N-of-1                                             | OMAS, VAS, WHO                   | Days 7, 10, 14, and 17 of each study cycle.                                                 | Yes                                        | Yes                              | Yes                                 | Yes                        | Yes                                                                                       | Yes                                |
| de Koning (2007) [22]        | RCT              | Cross-over                                         | WHO                              | 2 days before start of chemotherapy cycle daily until full recovery of patient's condition. | Unclear                                    | Yes                              | No (personnel not blinded)          | Yes                        | Yes                                                                                       | Yes                                |
| Gandemer (2007) [23]         | RCT              | Parallel                                           | WHO                              | Daily for 3 weeks starting at beginning of chemotherapy                                     | Yes                                        | Yes                              | No                                  | No                         | Yes                                                                                       | Yes                                |
| Rojas de Morales (2001) [24] | RCT              | Parallel                                           | Rutkauskas Index                 | Twice a week when in hospital                                                               | Unclear                                    | Unclear                          | No                                  | No                         | No                                                                                        | No                                 |

Abbreviations: RCT – randomized controlled trial; WHO – World Health Organization; CTCAE – Common Terminology Criteria for Adverse Events; VAS – visual analogue scale; HSCT – hematopoietic stem cell transplantation

## REFERENCES

1. Patte C, Laplanche A, Bertozzi AI, et al. Granulocyte colony-stimulating factor in induction treatment of children with non-Hodgkin's lymphoma: a randomized study of the French Society of Pediatric Oncology. *Journal of clinical oncology : official journal of the American Society of Clinical Oncology* 2002;20(2):441-8
2. Michel G, Landman-Parker J, Auclerc MF, et al. Use of recombinant human granulocyte colony-stimulating factor to increase chemotherapy dose-intensity: a randomized trial in very high-risk childhood acute lymphoblastic leukemia. *Journal of clinical oncology : official journal of the American Society of Clinical Oncology* 2000;18(7):1517-24
3. Lehrnbecher T, Zimmermann M, Reinhardt D, Dworzak M, Stary J, Creutzig U. Prophylactic human granulocyte colony-stimulating factor after induction therapy in pediatric acute myeloid leukemia. *Blood* 2007;109(3):936-43 doi: 10.1182/blood-2006-07-035915published Online First: Epub Date]].
4. Ladenstein R, Valteau-Couanet D, Brock P, et al. Randomized Trial of prophylactic granulocyte colony-stimulating factor during rapid COJEC induction in pediatric patients with high-risk neuroblastoma: the European HR-NBL1/SIOPEN study. *Journal of clinical oncology : official journal of the American Society of Clinical Oncology* 2010;28(21):3516-24 doi: 10.1200/JCO.2009.27.3524published Online First: Epub Date]].
5. Cesaro S, Nesi F, Tridello G, et al. A randomized, non-inferiority study comparing efficacy and safety of a single dose of pegfilgrastim versus daily filgrastim in pediatric patients after autologous peripheral blood stem cell transplant. *PloS one* 2013;8(1):e53252 doi: 10.1371/journal.pone.0053252published Online First: Epub Date]].
6. Fox E, Widemann BC, Hawkins DS, et al. Randomized trial and pharmacokinetic study of pegfilgrastim versus filgrastim after dose-intensive chemotherapy in young adults and children with sarcomas. *Clin Cancer Res* 2009;15(23):7361-7 doi: 10.1158/1078-0432.CCR-09-0761published Online First: Epub Date]].

7. Wexler LH, Weaver-McClure L, Steinberg SM, et al. Randomized trial of recombinant human granulocyte-macrophage colony-stimulating factor in pediatric patients receiving intensive myelosuppressive chemotherapy. *Journal of clinical oncology : official journal of the American Society of Clinical Oncology* 1996;14(3):901-10
8. Uderzo C, Rebora P, Marrocco E, et al. Glutamine-enriched nutrition does not reduce mucosal morbidity or complications after stem-cell transplantation for childhood malignancies: a prospective randomized study. *Transplantation* 2011;91(12):1321-5 doi: 10.1097/TP.0b013e31821ab959published Online First: Epub Date]].
9. Aquino VM, Harvey AR, Garvin JH, et al. A double-blind randomized placebo-controlled study of oral glutamine in the prevention of mucositis in children undergoing hematopoietic stem cell transplantation: a pediatric blood and marrow transplant consortium study. *Bone marrow transplantation* 2005;36(7):611-6 doi: 10.1038/sj.bmt.1705084published Online First: Epub Date]].
10. Ward E, Smith M, Henderson M, et al. The effect of high-dose enteral glutamine on the incidence and severity of mucositis in paediatric oncology patients. *European journal of clinical nutrition* 2009;63(1):134-40 doi: 10.1038/sj.ejcn.1602894published Online First: Epub Date]].
11. Sencer SF, Zhou T, Freedman LS, et al. Traumeel S in preventing and treating mucositis in young patients undergoing SCT: a report of the Children's Oncology Group. *Bone marrow transplantation* 2012;47(11):1409-14 doi: 10.1038/bmt.2012.30published Online First: Epub Date]].
12. Oberbaum M, Yaniv I, Ben-Gal Y, et al. A randomized, controlled clinical trial of the homeopathic medication TRAUMEEL S in the treatment of chemotherapy-induced stomatitis in children undergoing stem cell transplantation. *Cancer* 2001;92(3):684-90
13. Oberbaum M, Yaniv I, Ben-Gal Y, et al. A randomized, controlled clinical trial of the homeopathic medication Traumeel S in the treatment of chemotherapy-induced stomatitis in children undergoing stem cell transplantation. [German]. *Biologische Medizin* 2002;31(1):25-31

14. Abramoff MMF, Lopes NNF, Lopes LA, et al. Low-level laser therapy in the prevention and treatment of chemotherapy-induced oral mucositis in young patients. *Photomed Laser Surg* 2008;26(4):393-400 doi: <http://dx.doi.org/10.1089/pho.2007.2144published> Online First: Epub Date]].
15. Cruz LB, Ribeiro AS, Rech A, Rosa LGN, Castro CG, Jr., Brunetto AL. Influence of low-energy laser in the prevention of oral mucositis in children with cancer receiving chemotherapy. *Pediatr Blood Cancer* 2007;48(4):435-40
16. Raether D, Walker PO, Bostrum B, Weisdorf D. Effectiveness of oral chlorhexidine for reducing stomatitis in a pediatric bone marrow transplant population. *Pediatric dentistry* 1989;11(1):37-42
17. Cheng KK, Chang AM, Yuen MP. Prevention of oral mucositis in paediatric patients treated with chemotherapy; a randomised crossover trial comparing two protocols of oral care. *European journal of cancer* 2004;40(8):1208-16 doi: 10.1016/j.ejca.2003.10.023published Online First: Epub Date]].
18. Cheng KKF. Children's acceptance and tolerance of chlorhexidine and benzydamine oral rinses in the treatment of chemotherapy-induced oropharyngeal mucositis. *Eur J Oncol Nurs* 2004;8(4):341-9
19. Cheng KKF, Chang AM. Palliation of oral mucositis symptoms in pediatric patients treated with cancer chemotherapy. *Cancer Nurs* 2003;26(6):476-84
20. Shenep JL, Kalwinsky DK, Hutson PR, et al. Efficacy of oral sucralfate suspension in prevention and treatment of chemotherapy-induced mucositis. *The Journal of pediatrics* 1988;113(4):758-63
21. Sung L, Tomlinson GA, Greenberg ML, et al. Serial controlled N-of-1 trials of topical vitamin E as prophylaxis for chemotherapy-induced oral mucositis in paediatric patients. *European journal of cancer* 2007;43(8):1269-75 doi: 10.1016/j.ejca.2007.02.001published Online First: Epub Date]].
22. de Koning BA, Philipsen-Geerling B, Hoijer M, Hahlen K, Buller HA, Pieters R. Protection against chemotherapy induced mucositis by TGF-beta(2) in childhood cancer patients: results from a randomized cross-over study. *Pediatr Blood Cancer* 2007;48(5):532-9 doi: 10.1002/pbc.20910published Online First: Epub Date]].

23. Gandemer V, Le Deley MC, Dollfus C, et al. Multicenter randomized trial of chewing gum for preventing oral mucositis in children receiving chemotherapy. *Journal of pediatric hematology/oncology* 2007;29(2):86-94 doi: 10.1097/MPH.0b013e318030a3e4published Online First: Epub Date]].
24. Rojas de Morales T, Zambrano O, Rivera L, et al. Oral-disease prevention in children with cancer: testing preventive protocol effectiveness. *Medicina Oral* 2001;6(5):326-34
