# Supplementary material for: Guideline for the prevention of oral and oropharyngeal mucositis in children receiving treatment for cancer or undergoing haematopoietic stem cell transplantation
Source: PubMed Central journal article supplement — BMJ Support Palliat Care. 2015 Mar 27;7(1):7–16. doi: 10.1136/bmjspcare-2014-000804 (PMC5339548; doi:10.1136/bmjspcare-2014-000804), 2015-03-27
Supplement: bmjspcare-2014-000804-s13.pdf [file bmjspcare-2014-000804-s13.pdf]

**APPENDIX 13: RANDOMIZED CONTROLLED TRIALS OF ANY INTERVENTION FOR THE PREVENTION OF ORAL MUCOSITIS IN PEDIATRIC PATIENTS RECEIVING TREATMENT FOR CANCER OR UNDERGOING HEMATOPOIETIC STEM CELL TRANSPLANTATION – OUTCOMES**

| First Author (Year)                          | COMPARISONS                                  | OUTCOMES                             |                                      |                                                                                                                                                              |                                                                |                                                                                          |
|----------------------------------------------|----------------------------------------------|--------------------------------------|--------------------------------------|--------------------------------------------------------------------------------------------------------------------------------------------------------------|----------------------------------------------------------------|------------------------------------------------------------------------------------------|
|                                              |                                              | Number Received Intervention Group 1 | Number Received Intervention Group 2 | Description of Main Mucositis Findings                                                                                                                       | Description of Main Pain Findings                              | Description of Adverse Events                                                            |
| Patte (2002) [1]                             | Lenograstim versus no lenograstim            | 75                                   | 73                                   | Incidence grade 3 and 4 mucositis similar between arms                                                                                                       | Not reported                                                   | Not reported                                                                             |
| Michel (2000) [2]                            | Lenograstim versus no lenograstim            | 34                                   | 33                                   | GCSF reduced incidence mucositis (6% vs 19%; P=0.04) after R3 but not after COPADM (65% vs 75%; P=NS)                                                        | Not reported                                                   | Not reported                                                                             |
| Lehrnbecher (2007) [3]                       | GCSF versus no GCSF                          | 161                                  | 156                                  | GCSF no impact on incidence grades 3 and 4 mucositis (26.6% with GCSF vs 23.6% without GCSF; P=0.59)                                                         | Not reported                                                   | Not reported                                                                             |
| Ladenstein (2010) [4]                        | Filgrastim versus no filgrastim              | 110                                  | 114                                  | Grade 2 to 4 mucositis significantly less with GCSF (2%) compared with no GCSF (6%; P=0.002)                                                                 | Not reported                                                   | Tolerance to GCSF good, only expected adverse effects reported                           |
| Cesaro (2013) [5]                            | Pegfilgrastim versus filgrastim              | 32                                   | 29                                   | No significant difference in Grade 2 to 4 mucositis with GCSF (76%) vs pegfilgrastim (59%). No significant difference in severity or duration between groups | Not reported                                                   | Both pegfilgrastim and filgrastim well tolerated, no significant adverse effects         |
| Fox (2009) [6]                               | Pegfilgrastim versus filgrastim              | 17                                   | 17                                   | Grade 2 to 4 mucositis occurred in 4 patients with pegfilgrastim and 7 patients with GCSF, respectively, during cycles 1 to 4                                | Not reported                                                   | Pegfilgrastim and GCSF well tolerated, adverse events similar between arms               |
| Wexler (1996) [7]                            | GMCSF versus no GMCSF                        | 19                                   | 18                                   | No significant differences in mucositis grade in cycles 1-2 and 3-18 between GMCSF and control groups                                                        | Not reported                                                   | Not reported                                                                             |
| Uderzo (2011) [8]                            | Glutamine enriched versus standard nutrition | 60                                   | 58                                   | Mucositis in the first 3 to 4 weeks from HSCT in 94.8% and 96.7% in standard and glutamine enriched groups (P=0.68)                                          | Not reported                                                   | Not reported                                                                             |
| Aquino (2005) [9]                            | Glutamine versus glycine                     | 57                                   | 63                                   | Mean mucositis score 3.0±0.3 vs 3.9±0.4 (P=0.07) in glutamine and glycine groups. No difference in maximum mucositis score (P=0.7)                           | Not reported                                                   | No statistically significant difference in toxicity between groups                       |
| Ward (2009) [10]                             | Enteral glutamine versus no glutamine        | 50                                   | 50                                   | No significant difference in severe mucositis (P=0.942) or duration of severe mucositis                                                                      | Not reported                                                   | No adverse effects attributed to glutamine                                               |
| Sencer (2012) [11]                           | Traumeel S versus placebo                    | 98                                   | 92                                   | Mean Walsh area under curves similar in two groups: 71.7 (SE 7.2) with Traumeel S and 69.8 (SE 8.2) with placebo. No difference in WHO scores.               | Not reported                                                   | No significant difference in adverse events between group                                |
| Oberbaum (2001) [12] (companion paper: [13]) | Traumeel S versus placebo                    | 15                                   | 15                                   | 33% with Traumeel S did not develop mucositis vs 7% with placebo. Mean area under curve mucositis scores 10.4 with Traumeel S vs 24.3 with placebo (P<0.01). | 5 in Traumeel S group had any oral pain vs 14 in placebo group | High incidence of serious complications but no significant difference between the groups |

| First Author (Year)                              | COMPARISONS                                                | OUTCOMES                             |                                      |                                                                                                                                                              |                                                                                                                              |                                                                                                                                 |
|--------------------------------------------------|------------------------------------------------------------|--------------------------------------|--------------------------------------|--------------------------------------------------------------------------------------------------------------------------------------------------------------|------------------------------------------------------------------------------------------------------------------------------|---------------------------------------------------------------------------------------------------------------------------------|
|                                                  |                                                            | Number Received Intervention Group 1 | Number Received Intervention Group 2 | Description of Main Mucositis Findings                                                                                                                       | Description of Main Pain Findings                                                                                            | Description of Adverse Events                                                                                                   |
| Abramoff (2008) [14]                             | Low level light therapy versus placebo                     | 11                                   | 11                                   | At the third evaluation, 73% prophylactic laser group did not have mucositis vs 27% placebo (P=0.03)                                                         | Not reported                                                                                                                 | Not reported                                                                                                                    |
| Cruz (2007) [15]                                 | Low level light therapy versus no low level light therapy  | 29                                   | 31                                   | No significant difference in mucositis grade on day 8 (P=0.234) or day 15 (P=0.208)                                                                          | Not reported                                                                                                                 | Not reported                                                                                                                    |
| Raether (1989) [16]                              | Chlorhexidine versus placebo                               | 23                                   | 24                                   | No significant difference in severity of oral ulceration between chlorhexidine and placebo groups (P=0.18)                                                   | Not reported                                                                                                                 | Not reported                                                                                                                    |
| Cheng (2004) [17] (companion papers:[18] , [19]) | Benzydamine versus chlorhexidine                           | 40                                   | 40                                   | Ulcerative lesions in 27% (chlorhexidine) and 59% (benzydamine) (P<0.05). 26% and 48% using chlorhexidine and benzydamine had WHO grade 2 mucositis (P<0.05) | Significant difference in mean area under the curve of mouth pain (chlorhexidine 1.35±2.26 vs benzydamine 3.09±3.21; P=0.05) | Not reported                                                                                                                    |
| Shenep (1988) [20]                               | Sucralfate versus placebo                                  | 24                                   | 24                                   | Objective observers noted more moderate and severe oral ulceration in placebo vs sucralfate groups (38% vs 12%; P=0.12)                                      | 58% patients sucralfate reported no oral pain vs 25% placebo (P=0.06)                                                        | 8 in placebo and 4 in sucralfate experienced rashes (P=0.18). One placebo patient had unexplained papilledema                   |
| Sung (2007) [21]                                 | Topical vitamin E versus placebo                           | 22                                   | 23                                   | No difference in objective mucositis scores with mean score 0.2 with vitamin E vs 0.3 with placebo                                                           | Vitamin E did not reduce pain VAS scores, mean scores of 0.9 (on a scale of 0–10) in each group                              | No unexpected toxicity with topical vitamin E. Many children complained study solution difficult to use because of oily texture |
| de Koning (2007) [22]                            | TGF-b2-enriched feeding versus placebo                     | 25                                   | 25                                   | Grade 3 or 4 mucositis occurred in 40% with TGF-b2-treatment vs 32% with placebo                                                                             | Not reported                                                                                                                 | No significant difference between the TGFb2 and placebo arms for any of toxicity parameters                                     |
| Gandemer (2007) [23]                             | Chewing gums versus no chewing gum                         | 73                                   | 72                                   | No overall reduction in severe oral mucositis in gum (51%) vs control arms (44%; P=0.67)                                                                     | Unable to assess pain because too few evaluations                                                                            | Proportion of patients experiencing adverse events did not differ between arms                                                  |
| Rojas de Morales (2001) [24]                     | Oral disease preventive protocol versus oral physiotherapy | 5                                    | 7                                    | No significant difference in mucositis (P>0.05)                                                                                                              | Not reported                                                                                                                 | Not reported                                                                                                                    |

Abbreviations: GCSF – granulocyte colony stimulating factor; GMCSF – granulocyte-macrophage colony stimulating factor; NS – not significant; HSCT – hematopoietic stem cell transplantation; SE – standard error; VAS – visual analogue scale

## REFERENCES

1. Patte C, Laplanche A, Bertozzi AI, et al. Granulocyte colony-stimulating factor in induction treatment of children with non-Hodgkin's lymphoma: a randomized study of the French Society of Pediatric Oncology. *Journal of clinical oncology : official journal of the American Society of Clinical Oncology* 2002;**20**(2):441-8
2. Michel G, Landman-Parker J, Auclerc MF, et al. Use of recombinant human granulocyte colony-stimulating factor to increase chemotherapy dose-intensity: a randomized trial in very high-risk childhood acute lymphoblastic leukemia. *Journal of clinical oncology : official journal of the American Society of Clinical Oncology* 2000;**18**(7):1517-24
3. Lehrnbecher T, Zimmermann M, Reinhardt D, Dworzak M, Stary J, Creutzig U. Prophylactic human granulocyte colony-stimulating factor after induction therapy in pediatric acute myeloid leukemia. *Blood* 2007;**109**(3):936-43 doi: 10.1182/blood-2006-07-035915published Online First: Epub Date]].
4. Ladenstein R, Valteau-Couanet D, Brock P, et al. Randomized Trial of prophylactic granulocyte colony-stimulating factor during rapid COJEC induction in pediatric patients with high-risk neuroblastoma: the European HR-NBL1/SIOPEN study. *Journal of clinical oncology : official journal of the American Society of Clinical Oncology* 2010;**28**(21):3516-24 doi: 10.1200/JCO.2009.27.3524published Online First: Epub Date]].
5. Cesaro S, Nesi F, Tridello G, et al. A randomized, non-inferiority study comparing efficacy and safety of a single dose of pegfilgrastim versus daily filgrastim in pediatric patients after autologous peripheral blood stem cell transplant. *PloS one* 2013;**8**(1):e53252 doi: 10.1371/journal.pone.0053252published Online First: Epub Date]].
6. Fox E, Widemann BC, Hawkins DS, et al. Randomized trial and pharmacokinetic study of pegfilgrastim versus filgrastim after dose-intensive chemotherapy in young adults and children

with sarcomas. *Clin Cancer Res* 2009;**15**(23):7361-7 doi: 10.1158/1078-0432.CCR-09-0761published Online First: Epub Date]].

7. Wexler LH, Weaver-McClure L, Steinberg SM, et al. Randomized trial of recombinant human granulocyte-macrophage colony-stimulating factor in pediatric patients receiving intensive myelosuppressive chemotherapy. *Journal of clinical oncology : official journal of the American Society of Clinical Oncology* 1996;**14**(3):901-10

8. Uderzo C, Rebora P, Marrocco E, et al. Glutamine-enriched nutrition does not reduce mucosal morbidity or complications after stem-cell transplantation for childhood malignancies: a prospective randomized study. *Transplantation* 2011;**91**(12):1321-5 doi: 10.1097/TP.0b013e31821ab959published Online First: Epub Date]].

9. Aquino VM, Harvey AR, Garvin JH, et al. A double-blind randomized placebo-controlled study of oral glutamine in the prevention of mucositis in children undergoing hematopoietic stem cell transplantation: a pediatric blood and marrow transplant consortium study. *Bone marrow transplantation* 2005;**36**(7):611-6 doi: 10.1038/sj.bmt.1705084published Online First: Epub Date]].

10. Ward E, Smith M, Henderson M, et al. The effect of high-dose enteral glutamine on the incidence and severity of mucositis in paediatric oncology patients. *European journal of clinical nutrition* 2009;**63**(1):134-40 doi: 10.1038/sj.ejcn.1602894published Online First: Epub Date]].

11. Sencer SF, Zhou T, Freedman LS, et al. Traumeel S in preventing and treating mucositis in young patients undergoing SCT: a report of the Children's Oncology Group. *Bone marrow transplantation* 2012;**47**(11):1409-14 doi: 10.1038/bmt.2012.30published Online First: Epub Date]].

12. Oberbaum M, Yaniv I, Ben-Gal Y, et al. A randomized, controlled clinical trial of the homeopathic medication TRAUMEEL S in the treatment of chemotherapy-induced stomatitis in children undergoing stem cell transplantation. *Cancer* 2001;**92**(3):684-90

13. Oberbaum M, Yaniv I, Ben-Gal Y, et al. A randomized, controlled clinical trial of the homoeopathic medication Traumeel S in the treatment of chemotherapy-induced stomatitis in children undergoing stem cell transplantation. [German]. *Biologische Medizin* 2002;**31**(1):25-31
14. Abramoff MMF, Lopes NNF, Lopes LA, et al. Low-level laser therapy in the prevention and treatment of chemotherapy-induced oral mucositis in young patients. *Photomed Laser Surg* 2008;**26**(4):393-400 doi: <http://dx.doi.org/10.1089/pho.2007.2144published> Online First: Epub Date]].
15. Cruz LB, Ribeiro AS, Rech A, Rosa LGN, Castro CG, Jr., Brunetto AL. Influence of low-energy laser in the prevention of oral mucositis in children with cancer receiving chemotherapy. *Pediatr Blood Cancer* 2007;**48**(4):435-40
16. Raether D, Walker PO, Bostrum B, Weisdorf D. Effectiveness of oral chlorhexidine for reducing stomatitis in a pediatric bone marrow transplant population. *Pediatric dentistry* 1989;**11**(1):37-42
17. Cheng KK, Chang AM, Yuen MP. Prevention of oral mucositis in paediatric patients treated with chemotherapy; a randomised crossover trial comparing two protocols of oral care. *European journal of cancer* 2004;**40**(8):1208-16 doi: 10.1016/j.ejca.2003.10.023published Online First: Epub Date]].
18. Cheng KKF. Children's acceptance and tolerance of chlorhexidine and benzydamine oral rinses in the treatment of chemotherapy-induced oropharyngeal mucositis. *Eur J Oncol Nurs* 2004;**8**(4):341-9
19. Cheng KKF, Chang AM. Palliation of oral mucositis symptoms in pediatric patients treated with cancer chemotherapy. *Cancer Nurs* 2003;**26**(6):476-84
20. Shenep JL, Kalwinsky DK, Hutson PR, et al. Efficacy of oral sucralfate suspension in prevention and treatment of chemotherapy-induced mucositis. *The Journal of pediatrics* 1988;**113**(4):758-63

21. Sung L, Tomlinson GA, Greenberg ML, et al. Serial controlled N-of-1 trials of topical vitamin E as prophylaxis for chemotherapy-induced oral mucositis in paediatric patients. *European journal of cancer* 2007;**43**(8):1269-75 doi: 10.1016/j.ejca.2007.02.001published Online First: Epub Date]].
22. de Koning BA, Philipsen-Geerling B, Hoijer M, Hahlen K, Buller HA, Pieters R. Protection against chemotherapy induced mucositis by TGF-beta(2) in childhood cancer patients: results from a randomized cross-over study. *Pediatr Blood Cancer* 2007;**48**(5):532-9 doi: 10.1002/pbc.20910published Online First: Epub Date]].
23. Gandemer V, Le Deley MC, Dollfus C, et al. Multicenter randomized trial of chewing gum for preventing oral mucositis in children receiving chemotherapy. *Journal of pediatric hematology/oncology* 2007;**29**(2):86-94 doi: 10.1097/MPH.0b013e318030a3e4published Online First: Epub Date]].
24. Rojas de Morales T, Zambrano O, Rivera L, et al. Oral-disease prevention in children with cancer: testing preventive protocol effectiveness. *Medicina Oral* 2001;**6**(5):326-34
